# Supplementary material for: Early supported discharge for older adults admitted to hospital with medical complaints: a protocol for a systematic review
Source: PubMed Central journal article supplement — BMJ Open. 2021 Oct 28;11(10):e049297. doi: 10.1136/bmjopen-2021-049297 (PMC8557271; doi:10.1136/bmjopen-2021-049297), 2021-10-28
Supplement: bmjopen-2021-049297.draft_revisions.pdf [file bmjopen-2021-049297.draft_revisions.pdf]

# BMJ Open

BMJ Open is committed to open peer review. As part of this commitment we make the peer review history of every article we publish publicly available.

When an article is published we post the peer reviewers' comments and the authors' responses online. We also post the versions of the paper that were used during peer review. These are the versions that the peer review comments apply to.

The versions of the paper that follow are the versions that were submitted during the peer review process. They are not the versions of record or the final published versions. They should not be cited or distributed as the published version of this manuscript.

BMJ Open is an open access journal and the full, final, typeset and author-corrected version of record of the manuscript is available on our site with no access controls, subscription charges or pay-per-view fees (<http://bmjopen.bmj.com>).

If you have any questions on BMJ Open's open peer review process please email [info.bmjopen@bmj.com](mailto:info.bmjopen@bmj.com)

# BMJ Open

## Early supported discharge for older adults admitted to hospital with medical complaints: a protocol for a systematic review

|                               |                                                                                                                                                                                                                                                                                                                                                                                                                                                                                                                                                                                                                                                                                                                                                                                                                                                                                                                                                                                                                    |
|-------------------------------|--------------------------------------------------------------------------------------------------------------------------------------------------------------------------------------------------------------------------------------------------------------------------------------------------------------------------------------------------------------------------------------------------------------------------------------------------------------------------------------------------------------------------------------------------------------------------------------------------------------------------------------------------------------------------------------------------------------------------------------------------------------------------------------------------------------------------------------------------------------------------------------------------------------------------------------------------------------------------------------------------------------------|
| Journal:                      | <i>BMJ Open</i>                                                                                                                                                                                                                                                                                                                                                                                                                                                                                                                                                                                                                                                                                                                                                                                                                                                                                                                                                                                                    |
| Manuscript ID                 | bmjopen-2021-049297                                                                                                                                                                                                                                                                                                                                                                                                                                                                                                                                                                                                                                                                                                                                                                                                                                                                                                                                                                                                |
| Article Type:                 | Protocol                                                                                                                                                                                                                                                                                                                                                                                                                                                                                                                                                                                                                                                                                                                                                                                                                                                                                                                                                                                                           |
| Date Submitted by the Author: | 02-Feb-2021                                                                                                                                                                                                                                                                                                                                                                                                                                                                                                                                                                                                                                                                                                                                                                                                                                                                                                                                                                                                        |
| Complete List of Authors:     | Williams, Susan; University of Limerick Faculty of Education and Health Sciences, School of Allied Health<br>Morrissey, Ann-Marie; University of Limerick Faculty of Education and Health Sciences, School of Allied Health<br>Steed, Fiona; University Hospital Limerick, Department of Ageing and Therapeutics<br>Leahy, Aoife; University of Limerick Faculty of Education and Health Sciences, School of Allied Health; University Hospital Limerick<br>Shanahan, Elaine ; University Hospital Limerick, Department of Ageing and Therapeutics<br>Peters, Catherine ; University Hospital Limerick, Department of Ageing and Therapeutics<br>O'Connor, Margaret; University Hospital Limerick, Department of Ageing and Therapeutics; University of Limerick Graduate Entry Medical School<br>Galvin, Rose; University of Limerick Faculty of Education and Health Sciences, School of Allied Health<br>O'Riordan, C; University of Limerick Faculty of Education and Health Sciences, School of Allied Health |
| Keywords:                     | GERIATRIC MEDICINE, REHABILITATION MEDICINE, GENERAL MEDICINE (see Internal Medicine)                                                                                                                                                                                                                                                                                                                                                                                                                                                                                                                                                                                                                                                                                                                                                                                                                                                                                                                              |
|                               |                                                                                                                                                                                                                                                                                                                                                                                                                                                                                                                                                                                                                                                                                                                                                                                                                                                                                                                                                                                                                    |

SCHOLARONE™  
Manuscripts

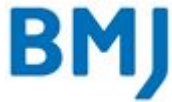

I, the Submitting Author has the right to grant and does grant on behalf of all authors of the Work (as defined in the below author licence), an exclusive licence and/or a non-exclusive licence for contributions from authors who are: i) UK Crown employees; ii) where BMJ has agreed a CC-BY licence shall apply, and/or iii) in accordance with the terms applicable for US Federal Government officers or employees acting as part of their official duties; on a worldwide, perpetual, irrevocable, royalty-free basis to BMJ Publishing Group Ltd ("BMJ") its licensees and where the relevant Journal is co-owned by BMJ to the co-owners of the Journal, to publish the Work in this journal and any other BMJ products and to exploit all rights, as set out in our [licence](#).

The Submitting Author accepts and understands that any supply made under these terms is made by BMJ to the Submitting Author unless you are acting as an employee on behalf of your employer or a postgraduate student of an affiliated institution which is paying any applicable article publishing charge ("APC") for Open Access articles. Where the Submitting Author wishes to make the Work available on an Open Access basis (and intends to pay the relevant APC), the terms of reuse of such Open Access shall be governed by a Creative Commons licence – details of these licences and which [Creative Commons](#) licence will apply to this Work are set out in our licence referred to above.

Other than as permitted in any relevant BMJ Author's Self Archiving Policies, I confirm this Work has not been accepted for publication elsewhere, is not being considered for publication elsewhere and does not duplicate material already published. I confirm all authors consent to publication of this Work and authorise the granting of this licence.

**Title page****Title**

Early supported discharge for older adults admitted to hospital with medical complaints: a protocol for a systematic review

**Authors:** Susan Williams<sup>1</sup>, Ann-Marie Morrissey<sup>1</sup>, Fiona Steed<sup>2</sup>, Aoife Leahy<sup>1,2</sup>, Elaine Shanahan<sup>2</sup>, Catherine Peters<sup>2</sup>, Margaret O'Connor<sup>2,3</sup>, Rose Galvin<sup>1</sup>, C O'Riordan<sup>1</sup>

**Author Affiliations**

<sup>1</sup>School of Allied Health, Faculty of Education and Health Sciences, Ageing Research Centre, Health Research Institute, University of Limerick, Ireland.

<sup>2</sup>Department of Ageing and Therapeutics, University Hospital Limerick, Dooradoyle, Limerick, Ireland

<sup>3</sup>Graduate Entry Medical School, Faculty of Education and Health Sciences, University of Limerick, Ireland

**Contact Author**

Susan Williams, School of Allied Health, Faculty of Education and Health Sciences, Ageing Research Centre, Health Research Institute, University of Limerick, Ireland. Email: [susan.williams@ul.ie](mailto:susan.williams@ul.ie)

**Corresponding Author**

Dr. Rose Galvin, School of Allied Health, Faculty of Education and Health Sciences, Ageing Research Centre, Health Research Institute, University of Limerick, Ireland. Email: [rose.galvin@ul.ie](mailto:rose.galvin@ul.ie) Contact: +353 61 234149

**Word Count:** 2,309

1  
2  
3 Early supported discharge for older adults admitted to hospital with medical  
4 complaints: a protocol for a systematic review  
5  
6  
7

8 **Abstract**  
9

10 **Introduction:** Early supported discharge aims to link acute and community care, allowing  
11 hospital inpatients to return home and continue to receive the necessary input from healthcare  
12 professionals that they would otherwise receive in hospital. The concept has been researched  
13 extensively in the stroke population, showing reduced length of stay for patients and improved  
14 functional outcomes. This systematic review aims to explore the totality of evidence for the  
15 use of early supported discharge in an older adult population who have been hospitalised with  
16 medical complaints.  
17  
18  
19  
20  
21  
22

23  
24  
25 **Methods:** A systematic review of randomised controlled trials and quasi randomised control  
26 trials will be carried out in line with PRISMA guidelines. Studies will be included if they  
27 provide an early supported discharge intervention to older adults admitted to hospital for  
28 medical complaints compared to continuing inpatient care. MEDLINE, CINAHL, CENTRAL  
29 and EMBASE databases will be searched. The primary outcome measure will be length of  
30 hospital stay, secondary outcomes will include functional abilities, falls, quality of life, carer  
31 and patient satisfaction, unplanned emergency department re-presentation, unscheduled  
32 hospital readmission, nursing home admission or mortality. Titles and abstracts of studies will  
33 be screened independently by two authors. The Cochrane Risk of Bias Tool will be used  
34 independently by two reviewers to assess the methodological quality of the included studies.  
35 GRADE will be used to assess the quality of the body of evidence. A pooled meta-analysis will  
36 be conducted using RevMan software 5.4.1, depending on the uniformity of the data.  
37  
38  
39  
40  
41  
42  
43  
44  
45  
46  
47  
48

49 **Ethics & Dissemination:** The authors will present the findings of the review to a Patient and  
50 Public Involvement stakeholder panel of older people that has been established at the Ageing  
51 Research Centre in the University of Limerick. Formal ethical approval is not required for the  
52 review as all data collected will be secondary data and will be analysed anonymously.  
53  
54  
55  
56  
57  
58

59 **PROSPERO Registration:** CRD42021223112  
60

1  
2  
3  
4  
5  
6 **Keywords:** early supported discharge; older adults; hospitalised; systematic review; medical  
7 inpatient  
8  
9

## 10 11 12 **Article Summary**

### 13 Strengths and Limitations

- 14  
15 • This is the first systematic review to synthesise the totality of evidence in relation to  
16 the effectiveness of ESD on clinical and process outcomes in hospitalised older adults  
17 with medical complaints  
18
- 19 • Reporting is in accordance with the Preferred Reporting Items for Systematic Reviews  
20 and Meta-Analyses statement  
21
- 22 • ESD interventions for stroke, surgical and elective hospital admissions will not be  
23 included  
24
- 25 • Robust and transparent methods used to identify, select, appraise and synthesise  
26 findings  
27
- 28 • The Cochrane Risk of Bias Tool and the GRADE Framework used to assess  
29 methodological quality  
30  
31  
32  
33  
34  
35  
36  
37  
38  
39  
40  
41  
42  
43  
44  
45  
46  
47  
48  
49  
50  
51  
52  
53  
54  
55  
56  
57  
58  
59  
60

## Introduction

Globally, it is anticipated that the number of adults aged  $\geq 65$  years will increase from one billion in 2019, to 1.4 billion by 2030 and further increase to 2.1 billion by 2050 [1]. With an aging population globally, the number and frequency of older adults presenting to acute hospitals is increasing. These older adults are more likely to have multiple co-morbidities and as a result require more complex management. It is known that older adults are the largest consumers of healthcare resources, so as our global population ages, health services must adapt to support older adults in the hospital and community settings and across transitions of care [2].

Up to 60% of older adults who present to the emergency department (ED) are admitted for inpatient care as demonstrated in a retrospective cohort study of 550 older adults by Kennelly, Drumm [3]. Of those who were discharged home from the ED, 46.5% re-attended the ED within one year. Older adults functional ability is negatively correlated with older age and an increasing number of comorbidities [4]. In the two weeks prior to a hospital admission, half of older adults will have experienced a functional decline at home, most commonly assessed by their ability to carry out their activities of daily living [5]. Furthermore, a longer hospital length of stay (LoS) is associated with a greater likelihood of functional decline and reduced chances of recovering from the same. Loyd, Markland [6] reported that up to 30% (95% CI 24% - 33%) of older adults experience hospital associated disability in their meta-analysis of 15 longitudinal studies of older adults hospitalised in acute care. By reducing hospital length of stay for older adults, their functional abilities can be preserved and in turn reduce their risk of adverse outcomes such as falls or hospital re-admission.

Discharge interventions are used by healthcare professionals in the acute hospital setting to improve the discharge process for the both the patient and the health system [7]. The discharge intervention can occur pre-discharge while the patient is an inpatient such as pre-discharge home visits and multi-disciplinary team interventions, post-discharge in the person's discharge destination such as home-based interventions, telephone follow-up and educational supports or, a combination of both pre- and post-discharge which includes consultant review in the inpatient setting with community follow-up [8].

Braet, Weltens [8] made a grade A recommendation (strong evidence to support the recommendation from multiple high-quality studies) for discharge interventions in an adult population discharged from medical or surgical wards beginning pre-discharge and continuing

1  
2  
3 post-discharge following their systematic review of 47 studies, focusing specifically on  
4 reducing hospital re-admissions. There was a large variation in the interventions provided,  
5 which included individualised exercise programmes, telephone follow-up, home visits, follow-  
6 up appointments and educational programmes.  
7  
8  
9

10  
11 Early supported discharge (ESD) is a discharge intervention aimed at linking inpatient care and  
12 community services to allow patients to return home more than would be otherwise possible  
13 with community care, by receiving additional input from healthcare professionals [9]. ESD for  
14 people with acute stroke has been widely researched. A Cochrane review of 17 randomised  
15 control trials (RCT's) examining ESD in acute stroke care found it to decrease LoS by an  
16 average of six days, and also decrease admissions to long term care [9]. Those with mild-  
17 moderate disability (broadly defined as a Barthel Index score >9 on initial assessment) made  
18 the greatest improvements. The authors did note that ESD is only an effective discharge  
19 intervention when ESD teams are sufficiently resourced. No statistically significant changes  
20 were noted in terms of the patient's mood or their subjective health status. ESD has also been  
21 explored in surgical populations. Kapur, Thorpe [10] demonstrated a significant reduction in  
22 LoS among patients undergoing hip replacement in their controlled before-after study.  
23  
24  
25  
26  
27  
28  
29  
30  
31

32  
33 More recently, the impact of ESD has been examined on patient and process outcomes among  
34 older adults admitted to hospital with medical complaints. Parsons, Parsons [11] conducted a  
35 RCT where an ESD intervention was provided to 97 older adults who were able to  
36 stand/transfer with maximum assistance of one for a maximum of six weeks when compared  
37 to routine care (n = 86). The intervention resulted in an average reduction in LoS by six days  
38 versus the control group (mean difference = 5.9 days; 95% CI 0.6-11.3). Significant  
39 improvements were also observed in functional independence in patients.  
40  
41  
42  
43  
44

45  
46 The National Institute for Health and Care Excellence (NICE) published guidelines in 2015  
47 focusing on the transition between acute and community care for older adults with social care  
48 needs [12]. The authors identified that families and carers can play an important role in the  
49 discharge process in terms of providing supplementary information about the patient's needs,  
50 which may decrease the risk of readmission to hospital. While carer outcomes (subjective  
51 health status, mood status and carer satisfaction) were analysed in the systematic review of  
52 ESD interventions for acute stroke care by Langhorne, Baylan [9], the role of carers in assisting  
53 with an ESD intervention was not explicitly noted. However, research demonstrates that  
54 involving caregivers in the discharge process can reduce the risk of readmissions in older adults  
55  
56  
57  
58  
59  
60



1  
2  
3 by 25% 90 days post discharge and 24% 180 days post discharge [13]. As per these NICE  
4 guidelines, ESD is a discharge intervention model that would potentially reduce the risk of  
5 readmission, while inevitably involving families/caregivers in a shared decision-making  
6 process.  
7  
8  
9

10 From the literature discussed, it evident that ESD is well-established in the stroke population.  
11 The totality of evidence regarding the use of ESD in older adults hospitalised for medical  
12 reasons has not yet been reviewed. Therefore, the overall aim of this systematic review is to  
13 synthesise the evidence in relation to the effectiveness of ESD on clinical and process outcomes  
14 in hospitalised older adults with medical complaints.  
15  
16  
17  
18  
19  
20  
21  
22  
23  
24

## 25 **Methods**

### 26 *Study Design*

27 This protocol for a systematic review will be conducted in line with the PRISMA-P guidelines  
28 [14]. The systematic review will be reported following the PRISMA guidelines [15]. The  
29 Cochrane Handbook for Systematic Reviews of Interventions will be adhered to as appropriate  
30 [16].  
31  
32  
33  
34  
35  
36  
37  
38  
39

### 40 *Study Identification*

41 Searches will be carried out in various databases including CINAHL in EBSCO, Cochrane  
42 Central Register of Controlled Trials in the Cochrane Library (CENTRAL), EMBASE and  
43 MEDLINE in EBSCO. MeSH terms and associated keywords will be used, covering broadly  
44 the topics of ESD, older adults and acute care and will be based off the search strategies used  
45 in Cochrane reviews carried out by Langhorne, Baylan [9] and Butterworth, Hays [17]. Sample  
46 search strategies can be seen in Appendices 1-4. Studies will be limited from the year 1997  
47 onwards, as this was when the concept of ESD was introduced as an intervention in RCT's for  
48 stroke care [18, 19]. The reference lists of studies meeting the inclusion criteria will be hand  
49 reviewed for further relevant studies.  
50  
51  
52  
53  
54  
55  
56

57 Studies will be included that meet the following inclusion criteria:  
58  
59  
60

1  
2  
3 Population - older adults (>65 years) admitted to the acute care setting for medical reasons.  
4

5 Intervention - ESD intervention, described as interventions aimed to accelerate patient  
6 discharge from hospital once medically stable, and providing patients with the necessary input  
7 in the community at the same level of intensity and resources they would receive while in the  
8 inpatient setting [9].  
9  
10

11 Control - usual care as described by study authors, other non-ESD interventions such as transfer  
12 to rehabilitation facilities or continuing multi-disciplinary team input in the inpatient setting,  
13 or an absence of ESD interventions.  
14  
15

16 Outcome - the primary outcome measure will be length of hospital stay. Secondary outcomes  
17 will include functional abilities (including Barthel Index), quality of life (including the SF-36),  
18 falls, injuries including fractures, carer and patient satisfaction, unplanned ED re-presentation,  
19 unscheduled hospital readmission, nursing home admission or mortality (the latter four  
20 outcomes measured by the number and frequency of each outcome as appropriate).  
21  
22

23 RCT's (including cluster trials) and quasi-RCT's will be included in this systematic review.  
24  
25  
26  
27

### 28 29 30 31 32 33 *Exclusion Criteria*

34 Studies will be excluded if their population is <65 years or have been admitted to hospital for  
35 non-medical reasons such as surgical/trauma or elective admissions. Stroke patients will also  
36 be excluded. Studies will also be excluded if the participants have only presented to the ED  
37 and have not experienced a subsequent hospital admission. Interventions will be excluded if  
38 they are not multi-disciplinary team led or are provided in step down facilities.  
39  
40  
41  
42  
43  
44

### 45 46 47 *Study Selection*

48 Studies will be downloaded in to Rayyan software and be screened against the inclusion criteria  
49 [20].  
50  
51

52 Two authors (SW and CO'R) will independently screen relevant studies by title and abstract.  
53 Studies that are selected by the reviewers as possibly meeting the inclusion criteria will undergo  
54 a full text review. If a disagreement occurs, both authors will meet to come to a consensus. In  
55 the event that an agreement cannot be reached, a third author will be consulted (A-MM).  
56  
57  
58  
59  
60

### *Study Synthesis*

Data will be independently extracted from the relevant studies by two reviewers (SW and A-MM). The information compiled will include study authors, year of publication, study population, interventions provided, controls provided, outcomes measured and duration of follow-up. Data describing the components of the ESD programmes will also be compiled in terms of resources allocated and service model used including inreach, outreach and discreet ESD models [21]. Data will be gathered into a pre-prepared Microsoft Excel document.

A pooled meta-analysis will be carried out where the data are homogenous, which will be determined by the outcomes measured and the time points accessed across the included studies. The effect size will be determined where the outcomes measured in the included studies measure the same construct. To do so, the mean and standard deviations from the appropriate outcomes will be extracted from both intervention and control groups in all relevant studies. The median and interquartile range will be used in the event that the mean and standard deviation is not available [22]. For continuous data we will calculate the treatment effect using standardised mean differences (SMD) and 95% CI where different studies used different scales for the assessment of the same outcome, and using mean differences (MD) and 95% CI where studies have all used the same method of measuring outcome. For dichotomous variables we will calculate the treatment effect using a fixed-effect/random-effect model and report it as risk ratios (RR) with 95% confidence intervals (CI). Authors will be contacted in the event data is not available. Data for the meta-analysis will be analysed using RevMan 5.4.1 Software [23].

### *Quality Assessment*

Studies that meet the inclusion criteria will be assessed for risk of bias using the Cochrane Risk of Bias Tool [24]. Two independent reviewers (SW and RG) will assess the included studies for selection bias, performance bias, detection bias, attrition bias, reporting bias, other bias and the overall risk of bias.

The GRADE framework will be used to assess the quality of evidence for each outcome measured [16]. Two independent reviewers (SW and RG) will assess the quality of each outcome across risk of bias, imprecision, inconsistency, indirectness and publication bias. Outcomes will be graded at one of four levels of evidence - very low, low, moderate and high.

1  
2  
3 Although it may be considered a subjective measure in assessing quality of evidence, GRADE  
4 is a transparent and reproducible framework.  
5  
6  
7  
8  
9

### 10 *Patient and Public Involvement*

11  
12 The authors will present the findings of the review to a Patient and Public Involvement (PPI)  
13 stakeholder panel of older people that has been established at the Ageing Research Centre in  
14 the University of Limerick. The focus of this session will be to discuss the findings with this  
15 group so that the discussion section of the paper can integrate the views and opinions of older  
16 people.  
17  
18  
19  
20  
21  
22

### 23 *Ethics & Dissemination*

24  
25  
26 Subsequently, the review will be published in a relevant peer-reviewed journal, following the  
27 PRISMA standardised reporting guidelines and through relevant conferences [15]. Formal  
28 ethical approval is not required for the review as all data collected will be secondary data and  
29 will be analysed anonymously.  
30  
31  
32  
33  
34  
35

### 36 *Study Status*

37  
38 Database searches have been completed.  
39  
40  
41  
42  
43  
44  
45

## 46 **Discussion**

47  
48 This review will synthesise the evidence relating to the effectiveness of ESD for older adults  
49 who are admitted to hospital with medical complaints. It is proposed that the ESD interventions  
50 included in this review will identify the necessary components of an ESD programme in terms  
51 of staffing and resources. This will enable recommendations to be made in terms of current and  
52 future ESD programmes following evidence-based practice.  
53  
54  
55

56  
57 By synthesising the evidence surrounding ESD in older adults and determining best practice,  
58 clinical and economic outcomes can be determined. There is potential for patient's LoS to be  
59  
60

1  
2  
3 reduced as is the case in stroke care. Reducing LoS could potentially reduce the risk of  
4 functional decline among older adults and further reduce their risk of readmission to hospital,  
5 the need for nursing home care or death [25]. Determining the impact of ESD on hospital bed  
6 days and overall hospital costs will inform policy makers. Establishing the impact on patient  
7 clinical outcomes will inform guideline development relating to processes which enable older  
8 adults to live in their community safely for longer.  
9  
10  
11  
12  
13  
14  
15  
16

### 17 **Author Contributions**

18 SW and RG were major contributors in writing the manuscript. SW, RG, A-MM and CO'R  
19 designed the overall study. SW developed the search strategy. All authors participated in  
20 critically appraising and editing the manuscript. RG is the guarantor of the review. All authors  
21 read and approved the final manuscript. The corresponding author attests that all listed authors  
22 meet authorship criteria and that no others meeting the criteria have been omitted.  
23  
24  
25  
26  
27  
28  
29  
30

### 31 **Funding**

32 No funding was required.  
33  
34  
35  
36  
37

### 38 **Conflicts of Interest**

39 None declared.  
40  
41  
42  
43  
44  
45  
46  
47  
48  
49  
50  
51  
52  
53  
54  
55  
56  
57  
58  
59  
60

## References

1. World Health Organisation, *Integrated care for older people: guidelines on community-level interventions to manage declines in intrinsic capacity*. 2017.
2. Olij, B.F., et al., *Economic evaluations of falls prevention programs for older adults: a systematic review*. Journal of the American Geriatrics Society, 2018. 66(11): p. 2197-2204.
3. Kennelly, S.P., et al., *Characteristics and outcomes of older persons attending the emergency department: a retrospective cohort study*. QJM, 2014. 107(12): p. 977-87.
4. Weng, C.F., et al., *Effects of depression, dementia and delirium on activities of daily living in elderly patients after discharge*. BMC Geriatr, 2019. 19(1): p. 261.
5. Zisberg, A., et al., *Hospital-Associated Functional Decline: The Role of Hospitalization Processes Beyond Individual Risk Factors*. Journal of the American Geriatrics Society (JAGS), 2015. 63(1): p. 55-62.
6. Loyd, C., et al., *Prevalence of Hospital-Associated Disability in Older Adults: A Meta-analysis*. J Am Med Dir Assoc, 2020. 21(4): p. 455-461 e5.
7. O'Connell Francischetto, E., et al., *Discharge interventions for older patients leaving hospital: protocol for a systematic meta-review*. Syst Rev, 2016. 5: p. 46.
8. Braet, A., C. Weltens, and W. Sermeus, *Effectiveness of discharge interventions from hospital to home on hospital readmissions: a systematic review*. JBI Database System Rev Implement Rep, 2016. 14(2): p. 106-73.
9. Langhorne, P., S. Baylan, and T. Early Supported Discharge, *Early supported discharge services for people with acute stroke*. Cochrane Database Syst Rev, 2017. 7: p. CD000443.
10. Kapur, B., P. Thorpe, and M. Ramakrishnan. *Early supported discharge: improving care for fractured neck of femur patients*. in *Orthopaedic Proceedings*. 2016. The British Editorial Society of Bone & Joint Surgery.
11. Parsons, M., et al., *Supported Discharge Teams for older people in hospital acute care: a randomised controlled trial*. Age Ageing, 2018. 47(2): p. 288-294.
12. National Institute for Health and Care Excellence, *Transition between inpatient hospital settings and community or care home settings for adults with social care needs*. 2015.

13. Rodakowski, J., et al., *Caregiver Integration During Discharge Planning for Older Adults to Reduce Resource Use: A Metaanalysis*. J Am Geriatr Soc, 2017. 65(8): p. 1748-1755.
14. Shamseer, L., et al., *Preferred reporting items for systematic review and meta-analysis protocols (PRISMA-P) 2015: elaboration and explanation*. BMJ, 2015. 2015 Jan 2;349(jan02 1):g7647.
15. Moher, D., et al., *Preferred Reporting Items for Systematic Reviews and Meta-Analyses: The PRISMA Statement*. 2009.
16. Higgins, J., et al., *Cochrane Handbook for Systematic Reviews of Interventions, version 6.1 (updated September 2020)*. 2020.
17. Butterworth, J.E., et al., *Interventions for involving older patients with multi-morbidity in decision-making during primary care consultations*. Cochrane Database Syst Rev, 2019. 2019(10).
18. Rudd, A.G., et al., *Randomised controlled trial to evaluate early discharge scheme for patients with stroke*. Bmj, 1997. 315(7115): p. 1039-1044.
19. Rodgers, H., et al., *Early supported hospital discharge following acute stroke: pilot study results*. Clinical rehabilitation, 1997. 11(4): p. 280-287.
20. Ouzzani, M., et al., *Rayyan — a web and mobile app for systematic reviews*. . 2016.
21. National Institute for Health and Care Excellence, *Stroke rehabilitation in adults (Clinical Guidance CG162)*. 2013.
22. Wan, X., et al., *Estimating the sample mean and standard deviation from the sample size, median, range and/or interquartile range*. BMC medical research methodology, 2014. 14(1): p. 135.
23. The Cochrane Collaboration, *Review Manager (Revman)*. Computer Program, Version 5.4.1, 2020.
24. Higgins, J.P., et al., *Revised Cochrane risk-of-bias tool for randomized trials (RoB 2)*. 2019.
25. Grimmer, K., et al., *TRialing individualized interventions to prevent functional decline in at-risk older adults (TRIIFL): study protocol for a randomized controlled trial nested in a longitudinal observational study*. 2013.

## Appendix 1: Sample CENTRAL Search Strategy

#1 [mh 'aged']

#2 [mh 'aging']

#3 (late life OR elder\* OR aged OR old age OR geriatric OR seniors): ti/ab/kw

#4 (old OR older OR aging OR aged OR senior OR elder\*) NEAR/3 (person OR persons OR people OR adult\* OR subject\* OR patient\* OR consumer\* OR male OR males OR female\* OR men OR women): ti/ab/kw

#5 (OR #1-#4)

#6 [mh 'patient discharge']

#7 [mh 'progressive patient care']

#8 [mh 'home care services']

#9 [mh 'home care services, hospital-based']

#10 [mh 'home nursing']

#11 (early supported discharge OR ESD): ti/ab/kw

#12 ((early OR earlier OR prompt OR accelerate\* OR acute OR subacute OR supported) NEAR/5 discharg\*): ti/ab/kw

#13 (reduce\* NEAR/5 (duration OR length) NEAR/5 (stay OR hospital)): ti/ab/kw

#14 (reduce\* NEAR/5 (hospital OR inpatient OR in-patient) NEAR/5 (stay OR care)): ti/ab/kw

#15 'short-term ward': ti/ab/kw

#16 ((organi?ed OR multidisciplinary) NEAR/5 discharge NEAR/5 team\*): ti/ab/kw

#17 ((early OR earlier OR prompt OR accelerate\* OR supported) NEAR/5 return\* NEAR/2 home\*): ti/ab/kw

#18 (hospital\* NEAR/3 home\*): ti/ab/kw

#19 'hospital rehabilitation unit\*': ti/ab/kw

#20 (rehabilitation near/3 home\*): ti/ab/kw

#21 (intensive NEAR/2 home NEAR/5 (rehabilitation OR support\*)): ti/ab/kw



1  
2  
3 #22 (mobile NEAR/2 team\*): ti/ab/kw  
4

5 #23 ((post-discharge OR home rehabilitation) NEAR/5 (support\* OR care)): ti/ab/kw  
6  
7

8 #24 ((early OR earlier OR acute OR subacute OR post-discharge) NEAR/5 (community OR  
9 domiciliary OR primary care OR home OR home-based) NEAR/5 (rehabilitation OR support\*  
10 OR care)): ti/ab/kw  
11  
12

13  
14 #25 (OR #6-#24)  
15

16 #26 (#5 AND #25)  
17  
18  
19  
20  
21  
22  
23  
24  
25  
26  
27  
28  
29  
30  
31  
32  
33  
34  
35  
36  
37  
38  
39  
40  
41  
42  
43  
44  
45  
46  
47  
48  
49  
50  
51  
52  
53  
54  
55  
56  
57  
58  
59  
60

For peer review only

## Appendix 2: Sample MEDLINE Search Strategy

1. exp aged
2. Aging
3. (Late life OR elder\* OR aged OR old age OR geriatric OR seniors) ti/ab
4. ((old OR older OR aging OR aged OR senior OR elder\*) N3 (person OR persons OR people OR adult\* OR subject\* OR patient\* OR consumer\* OR male OR males OR female\* OR men OR women)) ti/ab
5. (1. OR 2. OR 3. OR 4.)
6. 'Patient Discharge' ti/ab
7. 'Progressive Patient Care' ti/ab
8. home care services OR home care services, hospital-based OR home nursing ti/ab
9. (early supported discharge OR ESD) ti/ab
10. ((early OR earlier OR prompt OR accelerate\* OR acute OR subacute OR supported) N5 discharg\*) ti/ab
11. (reduce\* N5 (duration OR length) N5 (stay OR hospital)) ti/ab
12. (reduce\* N5 (hospital OR inpatient OR in-patient) N5 (stay OR care)) ti/ab
13. 'short-term ward' ti/ab
14. ((organi?ed OR multidisciplinary) N5 discharge N5 team\*) ti/ab
15. ((early OR earlier OR prompt OR accelerate\$ OR supported) N5 return\* N2 home\*) ti/ab
16. (hospital\* N3 home\*) ti/ab
17. 'hospital rehabilitation unit\*' ti/ab
18. (rehabilitation N3 home\*) ti/ab
19. (intensive N2 home N5 (rehabilitation OR support\*)) ti/ab
20. (mobile N2 team\*) ti/ab
21. 'organi?ed home care' ti/ab

- 1
- 2
- 3 22. ((post-discharge OR home rehabilitation) N5 (support\* OR care)) ti/ab
- 4
- 5
- 6 23. ((early OR earlier OR acute OR subacute OR post-discharge) N5 (community OR
- 7 domiciliary OR primary care OR home OR home-based) N5 (rehabilitation OR support\* OR
- 8 care)) ti/ab
- 9
- 10
- 11 24. OR/6-23
- 12
- 13
- 14 25. 5 AND 24
- 15
- 16 26. randomi?ed controlled trials ti/ab
- 17
- 18 27. random allocation ti/ab
- 19
- 20
- 21 28. controlled clinical trials ti/ab
- 22
- 23 29. control groups ti/ab
- 24
- 25 30. clinical trials ti/ab
- 26
- 27 31. double-blind ti/ab
- 28
- 29 32. single-blind ti/ab
- 30
- 31 33. research design ti/ab
- 32
- 33 34. program evaluation ti/ab
- 34
- 35 35. randomi?ed controlled trial pt.
- 36
- 37 36. controlled clinical trial pt.
- 38
- 39 37. clinical trial pt.
- 40
- 41 38. random\* ti/ab
- 42
- 43 39. (controlled N5 (trial\* OR stud\*)) ti/ab
- 44
- 45 40. (clinical\* N5 trial\*) ti/ab
- 46
- 47 41. ((control OR treatment OR experiment\* OR intervention) N5 (group\* OR subject\* OR
- 48 patient\*)) ti/ab
- 49
- 50 42. (quasi-random\* OR quasi random\* OR pseudo-random\* OR pseudo random\*) ti/ab
- 51
- 52
- 53
- 54
- 55
- 56
- 57
- 58
- 59
- 60

1  
2  
3 43. ((control OR experiment\* OR conservative) N5 (treatment OR therapy OR procedure OR  
4 manage\*)) ti/ab  
5

6  
7 44. ((singl\* OR doubl\* OR tripl\* OR trebl\*) N5 (blind\* OR mask\*)) ti/ab  
8

9 45. (assign\* OR allocate\*) ti/ab  
10

11 46. controls ti/ab  
12

13 47. trial ti/ab  
14

15 48. OR/26-47  
16

17 49. 25 AND 48  
18  
19  
20  
21  
22  
23  
24  
25  
26  
27  
28  
29  
30  
31  
32  
33  
34  
35  
36  
37  
38  
39  
40  
41  
42  
43  
44  
45  
46  
47  
48  
49  
50  
51  
52  
53  
54  
55  
56  
57  
58  
59  
60

For peer review only

### Appendix 3: Sample CINAHL Search Strategy

S1 (MH "Aged+")

S2 (MH "Aging+")

S3 TX (Late life OR elder\* OR aged OR old age OR geriatric OR seniors)

S4 TX ((old OR older OR aging OR aged OR senior OR elder\*) N3 (person OR persons OR people OR adult\* OR subject\* OR patient\* OR consumer\* OR male OR males OR female\* OR men OR women))

S5 S1 OR S2 OR S3 OR S4

S6 (MH "Home Health Care") OR (MH "Home Rehabilitation+") OR (MH "Home Nursing")

S7 ( TI ( (early OR earlier OR prompt OR accelerate\* OR acute OR subacute OR supported) ) AND TI discharge\* ) OR ( AB ( (early OR earlier OR prompt OR accelerate\* OR acute OR subacute OR supported) ) AND AB discharge\* )

S8 ( TI reduce\* AND TI ( (duration OR length) ) AND TI ( (stay OR hospital) ) ) OR ( AB reduce\* AND AB ( (duration OR length) ) AND AB ( (stay OR hospital) ) )

S9 ( TI reduc\* AND TI ( (hospital OR inpatient OR in-patient) ) AND TI ( (stay OR care) ) ) OR ( AB reduc\* AND AB ( (hospital OR inpatient OR inpatient) ) AND AB ( (stay OR care) ) )

S10 TI short-term ward OR AB short-term ward

S11 TI ( (organi?ed OR multidisciplinary) ) AND TI discharge AND TI team\*

S12 ( TI ( (organi?ed OR multidisciplinary) ) AND TI discharge AND TI team\* ) OR ( AB ( (organi?ed OR multidisciplinary) ) AND AB discharge AND AB team\* )

S13 ( TI ( (early OR earlier OR prompt OR accelerate\* OR supported) ) AND TI return\* AND TI home\* ) OR ( AB ( (early OR earlier OR prompt OR accelerate\* OR supported) ) AND AB return\* AND AB home\* )

S14 TI ( (hospital\* AND home\*) ) OR AB ( (hospital\* AND home\*) )

S15 TI hospital rehabilitation unit\* OR AB hospital rehabilitation unit\*

S16 TI ( (rehabilitation AND home\*) ) OR AB ( (rehabilitation AND home\*) )

1  
2  
3 S17 ( TI intensive AND TI home AND TI ( (rehabilitation OR support\*) ) )OR ( AB intensive  
4 AND AB home AND AB ( (rehabilitation or support\*) ) )

5  
6  
7 S18 TI ( (mobile AND team\*) ) OR AB ( (mobile AND team\*) )

8  
9 S19 TI organi?ed home care OR AB organi?ed home care

10  
11  
12 S20 ( TI ( (post-discharge OR home rehabilitation) ) AND TI ( (support\* OR care) ) ) OR ( AB  
13 ( (post-discharge OR home rehabilitation) ) AND AB ( (support\* OR care) ) )

14  
15  
16 S21 ( TI ( (early OR earlier OR acute OR subacute OR post-discharge) ) AND TI ( (community  
17 OR domiciliary OR primary care OR home OR homebased) ) AND TI ( (rehabilitation OR  
18 support\* OR care) ) ) OR ( AB ( (early OR earlier OR acute OR subacute OR post-discharge)  
19 ) AND AB ( (community OR domiciliary OR primary care OR home OR home-based) ) AND  
20 AB ( (rehabilitation OR support\* OR care) ) )

21  
22  
23 S22 S6 OR S7 OR S8 OR S9 OR S10 OR S11 OR S12 OR S13 OR S14 OR S15 OR S16 OR  
24 S17 OR S18 OR S19 OR S20 OR S21

25  
26  
27 S23 (MH "Randomized Controlled Trials") OR (MH "Random Assignment") OR (MH  
28 "Random Sample+")

29  
30 S24 (MH "Clinical Trials") OR (MH "Intervention Trials") OR (MH "Therapeutic Trials")

31  
32 S25 (MH "Double-Blind Studies") OR (MH "Single-Blind Studies") OR (MH "Triple-Blind  
33 Studies")

34  
35 S26 (MH "Control (Research)") OR (MH "Control Group") OR (MH "Placebos") OR (MH  
36 "Placebo Effect")

37  
38 S27 (MH "Crossover Design") OR (MH "Quasi-Experimental Studies")

39  
40 S28 PT (clinical trial OR randomized controlled trial)

41  
42 S29 TI (random\* OR RCT OR RCTs) OR AB (random\* OR RCT OR RCTs)

43  
44 S30 TI (controlled N5 (trial\* OR stud\*)) OR AB (controlled N5 (trial\* OR stud\*))

45  
46 S31 TI (clinical\* N5 trial\*) OR AB (clinical\* N5 trial\*)

47  
48 S32 TI ((control OR treatment OR experiment\* OR intervention) N5 (group\* OR subject\* OR  
49 patient\*)) OR AB ((control OR treatment OR experiment\* OR intervention) N5 (group\* OR  
50 subject\* OR patient\*))

1  
2  
3 S33 ((control OR experiment\* OR conservative) N5 (treatment OR therapy OR procedure OR  
4 manage\*)) OR AB ((control OR experiment\* OR conservative) N5 (treatment OR therapy OR  
5 procedure OR manage\*))  
6  
7

8  
9 S34 TI ((singl\* OR doubl\* OR tripl\* OR trebl\*) N5 (blind\* OR mask\*)) OR AB ((singl\* OR  
10 doubl\* OR tripl\* OR trebl\*) N5 (blind\* OR mask\*))  
11  
12

13 S35 TI (cross-over OR cross over OR crossover) or AB (cross-over OR cross over OR  
14 crossover)  
15  
16

17 S36 TI (placebo\* OR sham) or AB (placebo\* OR sham)  
18  
19

20 S37 TI trial  
21

22 S38 TI (assign\* OR allocat\*) OR AB (assign\* OR allocat\*)  
23  
24

25 S39 TI controls OR AB controls  
26

27 S40 TI (quasi-random\* OR quasi random\* OR pseudo-random\* OR pseudo random\*) OR AB  
28 (quasi-random\* OR quasi random\* OR pseudorandom\* OR pseudo random\*)  
29  
30

31 S41 S23 OR S24 OR S25 OR S26 OR S27 OR S28 OR S29 OR S30 OR S31 OR S32 OR S33  
32 OR S34 OR S35 OR S36 OR S37 OR S38 OR S39 OR S40  
33  
34

35 S42 S5 AND S22 AND S41  
36  
37  
38  
39  
40  
41  
42  
43  
44  
45  
46  
47  
48  
49  
50  
51  
52  
53  
54  
55  
56  
57  
58  
59  
60

#### Appendix 4: Sample EMBASE Search Strategy

1. aged
2. exp aging
3. (Late life OR elder\* OR aged OR old age OR geriatric OR seniors) ti/ab/kw
4. ((old OR older OR aging OR aged OR senior OR elder\*) NEAR/3 (person OR persons OR people OR adult\* OR subject\* OR patient\* OR consumer\* OR male OR males OR female\* OR men OR women)) ti/ab/kw
5. OR/1-4
6. 'hospital discharge' ti/ab/kw
7. 'early supported discharge' ti/ab/kw
8. 'progressive patient care' ti/ab/kw
9. 'home care' OR 'home physiotherapy' OR 'home rehabilitation' ti/ab/kw
10. 'home environment' ti/ab/kw
11. 'community based rehabilitation' ti/ab/kw
12. (early supported discharge OR ESD) ti/ab/kw
13. ((early OR earlier OR prompt OR accelerate\$ OR acute OR subacute OR supported) NEAR/5 discharg\$) ti/ab/kw
14. (reduce\$ NEAR/5 (duration OR length) NEAR/5 (stay OR hospital)) ti/ab/kw
15. (reduce\$ NEAR/5 (hospital OR inpatient OR in-patient) NEAR/5 (stay OR care)) ti/ab/kw
16. short-term ward ti/ab/kw
17. ((organi?ed OR multidisciplinary) NEAR/5 discharge NEAR/5 team\$) ti/ab/kw
18. ((early OR earlier OR prompt OR accelerate\$ OR supported) NEAR/5 return\$ NEAR/2 home\$) ti/ab/kw
19. (hospital\$ NEAR/3 home\$) ti/ab/kw
20. hospital rehabilitation unit\$ ti/ab/kw



- 1
- 2
- 3 21. (rehabilitation NEAR/3 home\$) ti/ab/kw
- 4
- 5 22. (intensive NEAR/2 home NEAR/5 (rehabilitation OR support\$)) ti/ab/kw
- 6
- 7
- 8 23. (mobile NEAR/2 team\$) ti/ab/kw
- 9
- 10 24. organi?ed home care ti/ab/kw
- 11
- 12
- 13 25. ((post-discharge OR home rehabilitation) NEAR/5 (support\$ OR care)) ti/ab/kw
- 14
- 15 26. ((early OR earlier OR acute OR subacute OR post-discharge) NEAR/5 (community OR
- 16 domiciliary OR primary care OR home OR home-based) NEAR/5 (rehabilitation OR support\$
- 17 OR care)) ti/ab/kw
- 18
- 19
- 20
- 21 27. OR/6-26
- 22
- 23 28. 'Randomi?ed Controlled Trial' ti/ab/kw
- 24
- 25
- 26 29. Randomi?ation ti/ab/kw
- 27
- 28 30. 'Controlled Study' ti/ab/kw
- 29
- 30
- 31 31. 'control group' ti/ab/kw
- 32
- 33 32. 'clinical trial' OR 'phase 1 clinical trial' OR 'phase 2 clinical trial' OR 'phase 3 clinical
- 34 trial' OR 'phase 4 clinical trial' OR 'controlled clinical trial' ti/ab/kw
- 35
- 36
- 37 33. 'Double Blind Procedure' ti/ab/kw
- 38
- 39 34. 'Single Blind Procedure' OR 'triple blind procedure' ti/ab/kw
- 40
- 41
- 42 35. 'Parallel Design' ti/ab/kw
- 43
- 44 36. random\$ ti/ab/kw
- 45
- 46 37. (controlled NEAR/5 (trial\$ OR stud\$)) ti/ab/kw
- 47
- 48 38. (clinical\$ NEAR/5 trial\$) ti/ab/kw
- 49
- 50 39. ((control OR treatment OR experiment\$ OR intervention) NEAR/5 (group\$ OR subject\$
- 51 OR patient\$)) ti/ab/kw
- 52
- 53
- 54 40. ((control OR experiment\$ OR conservative) NEAR/5 (treatment OR therapy OR procedure
- 55 OR manage\$)) ti/ab/kw
- 56
- 57
- 58 41. ((singl\$ OR doubl\$ OR tripl\$ OR trebl\$) NEAR/5 (blind\$ OR mask\$)) ti/ab/kw
- 59
- 60

1  
2  
3 42. (assign\$ OR alternate OR allocat\$ OR counterbalance\$ OR multiple baseline) ti/ab/kw  
4

5 43. controls ti/ab/kw  
6

7 44. trial ti/ab/kw  
8

9 45. OR/28-44  
10

11 46. 5 AND 27 AND 45  
12  
13  
14  
15  
16  
17  
18  
19  
20  
21  
22  
23  
24  
25  
26  
27  
28  
29  
30  
31  
32  
33  
34  
35  
36  
37  
38  
39  
40  
41  
42  
43  
44  
45  
46  
47  
48  
49  
50  
51  
52  
53  
54  
55  
56  
57  
58  
59  
60

For peer review only

# Reporting checklist for protocol of a systematic review.

Based on the PRISMA-P guidelines.

## Instructions to authors

Complete this checklist by entering the page numbers from your manuscript where readers will find each of the items listed below.

Your article may not currently address all the items on the checklist. Please modify your text to include the missing information. If you are certain that an item does not apply, please write "n/a" and provide a short explanation.

Upload your completed checklist as an extra file when you submit to a journal.

In your methods section, say that you used the PRISMA-Preorting guidelines, and cite them as:

Moher D, Shamseer L, Clarke M, Ghersi D, Liberati A, Petticrew M, Shekelle P, Stewart LA. Preferred Reporting Items for Systematic Review and Meta-Analysis Protocols (PRISMA-P) 2015 statement. Syst Rev. 2015;4(1):1.

|                     | Reporting Item                                                                                                        | Page Number                                                                  |
|---------------------|-----------------------------------------------------------------------------------------------------------------------|------------------------------------------------------------------------------|
| <b>Title</b>        |                                                                                                                       |                                                                              |
| Identification      | <a href="#">#1a</a> Identify the report as a protocol of a systematic review                                          | 1                                                                            |
| Update              | <a href="#">#1b</a> If the protocol is for an update of a previous systematic review, identify as such                | N/A - this is the first review of this intervention in this population group |
| <b>Registration</b> |                                                                                                                       |                                                                              |
|                     | <a href="#">#2</a> If registered, provide the name of the registry (such as PROSPERO) and registration number         | 2                                                                            |
| <b>Authors</b>      |                                                                                                                       |                                                                              |
| Contact             | <a href="#">#3a</a> Provide name, institutional affiliation, e-mail address of all protocol authors; provide physical | 1                                                                            |

|    |                           |                                                                                                                                                                                                                                                  |                            |
|----|---------------------------|--------------------------------------------------------------------------------------------------------------------------------------------------------------------------------------------------------------------------------------------------|----------------------------|
|    |                           | mailing address of corresponding author                                                                                                                                                                                                          |                            |
| 1  |                           |                                                                                                                                                                                                                                                  |                            |
| 2  |                           |                                                                                                                                                                                                                                                  |                            |
| 3  | Contribution              | <a href="#">#3b</a> Describe contributions of protocol authors and identify the guarantor of the review                                                                                                                                          | 10                         |
| 4  |                           |                                                                                                                                                                                                                                                  |                            |
| 5  |                           |                                                                                                                                                                                                                                                  |                            |
| 6  | <b>Amendments</b>         |                                                                                                                                                                                                                                                  |                            |
| 7  |                           |                                                                                                                                                                                                                                                  |                            |
| 8  |                           |                                                                                                                                                                                                                                                  |                            |
| 9  |                           | <a href="#">#4</a> If the protocol represents an amendment of a previously completed or published protocol, identify as such and list changes; otherwise, state plan for documenting important protocol amendments                               | N/A                        |
| 10 |                           |                                                                                                                                                                                                                                                  |                            |
| 11 |                           |                                                                                                                                                                                                                                                  |                            |
| 12 |                           |                                                                                                                                                                                                                                                  |                            |
| 13 |                           |                                                                                                                                                                                                                                                  |                            |
| 14 |                           |                                                                                                                                                                                                                                                  |                            |
| 15 |                           |                                                                                                                                                                                                                                                  |                            |
| 16 |                           |                                                                                                                                                                                                                                                  |                            |
| 17 | <b>Support</b>            |                                                                                                                                                                                                                                                  |                            |
| 18 |                           |                                                                                                                                                                                                                                                  |                            |
| 19 | Sources                   | <a href="#">#5a</a> Indicate sources of financial or other support for the review                                                                                                                                                                | 10                         |
| 20 |                           |                                                                                                                                                                                                                                                  |                            |
| 21 |                           |                                                                                                                                                                                                                                                  |                            |
| 22 |                           |                                                                                                                                                                                                                                                  |                            |
| 23 | Sponsor                   | <a href="#">#5b</a> Provide name for the review funder and / or sponsor                                                                                                                                                                          | N/A - no funding was given |
| 24 |                           |                                                                                                                                                                                                                                                  |                            |
| 25 |                           |                                                                                                                                                                                                                                                  |                            |
| 26 |                           |                                                                                                                                                                                                                                                  |                            |
| 27 | Role of sponsor or funder | <a href="#">#5c</a> Describe roles of funder(s), sponsor(s), and / or institution(s), if any, in developing the protocol                                                                                                                         | N/A - no funding was given |
| 28 |                           |                                                                                                                                                                                                                                                  |                            |
| 29 |                           |                                                                                                                                                                                                                                                  |                            |
| 30 |                           |                                                                                                                                                                                                                                                  |                            |
| 31 | <b>Introduction</b>       |                                                                                                                                                                                                                                                  |                            |
| 32 |                           |                                                                                                                                                                                                                                                  |                            |
| 33 | Rationale                 | <a href="#">#6</a> Describe the rationale for the review in the context of what is already known                                                                                                                                                 | 4-6                        |
| 34 |                           |                                                                                                                                                                                                                                                  |                            |
| 35 |                           |                                                                                                                                                                                                                                                  |                            |
| 36 |                           |                                                                                                                                                                                                                                                  |                            |
| 37 | Objectives                | <a href="#">#7</a> Provide an explicit statement of the question(s) the review will address with reference to participants, interventions, comparators, and outcomes (PICO)                                                                      | 6                          |
| 38 |                           |                                                                                                                                                                                                                                                  |                            |
| 39 |                           |                                                                                                                                                                                                                                                  |                            |
| 40 |                           |                                                                                                                                                                                                                                                  |                            |
| 41 |                           |                                                                                                                                                                                                                                                  |                            |
| 42 | <b>Methods</b>            |                                                                                                                                                                                                                                                  |                            |
| 43 |                           |                                                                                                                                                                                                                                                  |                            |
| 44 | Eligibility criteria      | <a href="#">#8</a> Specify the study characteristics (such as PICO, study design, setting, time frame) and report characteristics (such as years considered, language, publication status) to be used as criteria for eligibility for the review | 6-7                        |
| 45 |                           |                                                                                                                                                                                                                                                  |                            |
| 46 |                           |                                                                                                                                                                                                                                                  |                            |
| 47 |                           |                                                                                                                                                                                                                                                  |                            |
| 48 |                           |                                                                                                                                                                                                                                                  |                            |
| 49 |                           |                                                                                                                                                                                                                                                  |                            |
| 50 |                           |                                                                                                                                                                                                                                                  |                            |
| 51 |                           |                                                                                                                                                                                                                                                  |                            |
| 52 |                           |                                                                                                                                                                                                                                                  |                            |
| 53 | Information sources       | <a href="#">#9</a> Describe all intended information sources (such as electronic databases, contact with study authors, trial registers or other grey literature sources) with planned dates of coverage                                         | 6                          |
| 54 |                           |                                                                                                                                                                                                                                                  |                            |
| 55 |                           |                                                                                                                                                                                                                                                  |                            |
| 56 |                           |                                                                                                                                                                                                                                                  |                            |
| 57 |                           |                                                                                                                                                                                                                                                  |                            |
| 58 |                           |                                                                                                                                                                                                                                                  |                            |
| 59 |                           |                                                                                                                                                                                                                                                  |                            |
| 60 |                           |                                                                                                                                                                                                                                                  |                            |

|    |                    |                      |                                                                                                                                                                                                                                                           |                |
|----|--------------------|----------------------|-----------------------------------------------------------------------------------------------------------------------------------------------------------------------------------------------------------------------------------------------------------|----------------|
| 1  | Search strategy    | <a href="#">#10</a>  | Present draft of search strategy to be used for at least one electronic database, including planned limits, such that it could be repeated                                                                                                                | Appendices 1-4 |
| 2  |                    |                      |                                                                                                                                                                                                                                                           |                |
| 3  |                    |                      |                                                                                                                                                                                                                                                           |                |
| 4  |                    |                      |                                                                                                                                                                                                                                                           |                |
| 5  |                    |                      |                                                                                                                                                                                                                                                           |                |
| 6  | Study records -    | <a href="#">#11a</a> | Describe the mechanism(s) that will be used to manage records and data throughout the review                                                                                                                                                              | 8              |
| 7  | data management    |                      |                                                                                                                                                                                                                                                           |                |
| 8  |                    |                      |                                                                                                                                                                                                                                                           |                |
| 9  |                    |                      |                                                                                                                                                                                                                                                           |                |
| 10 | Study records -    | <a href="#">#11b</a> | State the process that will be used for selecting studies (such as two independent reviewers) through each phase of the review (that is, screening, eligibility and inclusion in meta-analysis)                                                           | 8              |
| 11 | selection process  |                      |                                                                                                                                                                                                                                                           |                |
| 12 |                    |                      |                                                                                                                                                                                                                                                           |                |
| 13 |                    |                      |                                                                                                                                                                                                                                                           |                |
| 14 |                    |                      |                                                                                                                                                                                                                                                           |                |
| 15 |                    |                      |                                                                                                                                                                                                                                                           |                |
| 16 |                    |                      |                                                                                                                                                                                                                                                           |                |
| 17 |                    |                      |                                                                                                                                                                                                                                                           |                |
| 18 | Study records -    | <a href="#">#11c</a> | Describe planned method of extracting data from reports (such as piloting forms, done independently, in duplicate), any processes for obtaining and confirming data from investigators                                                                    | 8              |
| 19 | data collection    |                      |                                                                                                                                                                                                                                                           |                |
| 20 | process            |                      |                                                                                                                                                                                                                                                           |                |
| 21 |                    |                      |                                                                                                                                                                                                                                                           |                |
| 22 |                    |                      |                                                                                                                                                                                                                                                           |                |
| 23 |                    |                      |                                                                                                                                                                                                                                                           |                |
| 24 |                    |                      |                                                                                                                                                                                                                                                           |                |
| 25 | Data items         | <a href="#">#12</a>  | List and define all variables for which data will be sought (such as PICO items, funding sources), any pre-planned data assumptions and simplifications                                                                                                   | 8              |
| 26 |                    |                      |                                                                                                                                                                                                                                                           |                |
| 27 |                    |                      |                                                                                                                                                                                                                                                           |                |
| 28 |                    |                      |                                                                                                                                                                                                                                                           |                |
| 29 |                    |                      |                                                                                                                                                                                                                                                           |                |
| 30 |                    |                      |                                                                                                                                                                                                                                                           |                |
| 31 |                    |                      |                                                                                                                                                                                                                                                           |                |
| 32 | Outcomes and       | <a href="#">#13</a>  | List and define all outcomes for which data will be sought, including prioritization of main and additional outcomes, with rationale                                                                                                                      | 7-8            |
| 33 | prioritization     |                      |                                                                                                                                                                                                                                                           |                |
| 34 |                    |                      |                                                                                                                                                                                                                                                           |                |
| 35 |                    |                      |                                                                                                                                                                                                                                                           |                |
| 36 |                    |                      |                                                                                                                                                                                                                                                           |                |
| 37 | Risk of bias in    | <a href="#">#14</a>  | Describe anticipated methods for assessing risk of bias of individual studies, including whether this will be done at the outcome or study level, or both; state how this information will be used in data synthesis                                      | 8-9            |
| 38 | individual studies |                      |                                                                                                                                                                                                                                                           |                |
| 39 |                    |                      |                                                                                                                                                                                                                                                           |                |
| 40 |                    |                      |                                                                                                                                                                                                                                                           |                |
| 41 |                    |                      |                                                                                                                                                                                                                                                           |                |
| 42 |                    |                      |                                                                                                                                                                                                                                                           |                |
| 43 |                    |                      |                                                                                                                                                                                                                                                           |                |
| 44 |                    |                      |                                                                                                                                                                                                                                                           |                |
| 45 | Data synthesis     | <a href="#">#15a</a> | Describe criteria under which study data will be quantitatively synthesised                                                                                                                                                                               | 8              |
| 46 |                    |                      |                                                                                                                                                                                                                                                           |                |
| 47 |                    |                      |                                                                                                                                                                                                                                                           |                |
| 48 |                    |                      |                                                                                                                                                                                                                                                           |                |
| 49 | Data synthesis     | <a href="#">#15b</a> | If data are appropriate for quantitative synthesis, describe planned summary measures, methods of handling data and methods of combining data from studies, including any planned exploration of consistency (such as I <sup>2</sup> , Kendall's $\tau$ ) | 8              |
| 50 |                    |                      |                                                                                                                                                                                                                                                           |                |
| 51 |                    |                      |                                                                                                                                                                                                                                                           |                |
| 52 |                    |                      |                                                                                                                                                                                                                                                           |                |
| 53 |                    |                      |                                                                                                                                                                                                                                                           |                |
| 54 |                    |                      |                                                                                                                                                                                                                                                           |                |
| 55 |                    |                      |                                                                                                                                                                                                                                                           |                |
| 56 |                    |                      |                                                                                                                                                                                                                                                           |                |
| 57 |                    |                      |                                                                                                                                                                                                                                                           |                |
| 58 | Data synthesis     | <a href="#">#15c</a> | Describe any proposed additional analyses (such                                                                                                                                                                                                           | 8              |
| 59 |                    |                      |                                                                                                                                                                                                                                                           |                |
| 60 |                    |                      |                                                                                                                                                                                                                                                           |                |

as sensitivity or subgroup analyses, meta-regression)

|                                 |                                   |                      |                                                                                                                               |     |
|---------------------------------|-----------------------------------|----------------------|-------------------------------------------------------------------------------------------------------------------------------|-----|
| 1<br>2<br>3<br>4<br>5<br>6<br>7 | Data synthesis                    | <a href="#">#15d</a> | If quantitative synthesis is not appropriate, describe the type of summary planned                                            | N/A |
| 8<br>9<br>10<br>11<br>12        | Meta-bias(es)                     | <a href="#">#16</a>  | Specify any planned assessment of meta-bias(es) (such as publication bias across studies, selective reporting within studies) | 8-9 |
| 13<br>14<br>15<br>16<br>17      | Confidence in cumulative evidence | <a href="#">#17</a>  | Describe how the strength of the body of evidence will be assessed (such as GRADE)                                            | 8-9 |

Notes:

- 1b: N/A - this is the first review of this intervention in this population group
- 5b: N/A - no funding was given
- 5c: N/A - no funding was given
- 10: Appendices 1-4 The PRISMA-P checklist is distributed under the terms of the Creative Commons Attribution License CC-BY 4.0. This checklist was completed on 24. January 2021 using <https://www.goodreports.org/>, a tool made by the [EQUATOR Network](#) in collaboration with [Penelope.ai](#)

# BMJ Open

## Early supported discharge for older adults admitted to hospital with medical complaints: a protocol for a systematic review

|                                 |                                                                                                                                                                                                                                                                                                                                                                                                                                                                                                                                                                                                                                                                                                                                                                                                                                                                                                                                                                                                                    |
|---------------------------------|--------------------------------------------------------------------------------------------------------------------------------------------------------------------------------------------------------------------------------------------------------------------------------------------------------------------------------------------------------------------------------------------------------------------------------------------------------------------------------------------------------------------------------------------------------------------------------------------------------------------------------------------------------------------------------------------------------------------------------------------------------------------------------------------------------------------------------------------------------------------------------------------------------------------------------------------------------------------------------------------------------------------|
| Journal:                        | <i>BMJ Open</i>                                                                                                                                                                                                                                                                                                                                                                                                                                                                                                                                                                                                                                                                                                                                                                                                                                                                                                                                                                                                    |
| Manuscript ID                   | bmjopen-2021-049297.R1                                                                                                                                                                                                                                                                                                                                                                                                                                                                                                                                                                                                                                                                                                                                                                                                                                                                                                                                                                                             |
| Article Type:                   | Protocol                                                                                                                                                                                                                                                                                                                                                                                                                                                                                                                                                                                                                                                                                                                                                                                                                                                                                                                                                                                                           |
| Date Submitted by the Author:   | 18-Jul-2021                                                                                                                                                                                                                                                                                                                                                                                                                                                                                                                                                                                                                                                                                                                                                                                                                                                                                                                                                                                                        |
| Complete List of Authors:       | Williams, Susan; University of Limerick Faculty of Education and Health Sciences, School of Allied Health<br>Morrissey, Ann-Marie; University of Limerick Faculty of Education and Health Sciences, School of Allied Health<br>Steed, Fiona; University Hospital Limerick, Department of Ageing and Therapeutics<br>Leahy, Aoife; University of Limerick Faculty of Education and Health Sciences, School of Allied Health; University Hospital Limerick<br>Shanahan, Elaine ; University Hospital Limerick, Department of Ageing and Therapeutics<br>Peters, Catherine ; University Hospital Limerick, Department of Ageing and Therapeutics<br>O'Connor, Margaret; University Hospital Limerick, Department of Ageing and Therapeutics; University of Limerick Graduate Entry Medical School<br>Galvin, Rose; University of Limerick Faculty of Education and Health Sciences, School of Allied Health<br>O'Riordan, C; University of Limerick Faculty of Education and Health Sciences, School of Allied Health |
| <b>Primary Subject Heading</b>: | Geriatric medicine                                                                                                                                                                                                                                                                                                                                                                                                                                                                                                                                                                                                                                                                                                                                                                                                                                                                                                                                                                                                 |
| Secondary Subject Heading:      | Geriatric medicine, Rehabilitation medicine, Patient-centred medicine                                                                                                                                                                                                                                                                                                                                                                                                                                                                                                                                                                                                                                                                                                                                                                                                                                                                                                                                              |
| Keywords:                       | GERIATRIC MEDICINE, REHABILITATION MEDICINE, GENERAL MEDICINE (see Internal Medicine)                                                                                                                                                                                                                                                                                                                                                                                                                                                                                                                                                                                                                                                                                                                                                                                                                                                                                                                              |
|                                 |                                                                                                                                                                                                                                                                                                                                                                                                                                                                                                                                                                                                                                                                                                                                                                                                                                                                                                                                                                                                                    |

SCHOLARONE™  
Manuscripts



I, the Submitting Author has the right to grant and does grant on behalf of all authors of the Work (as defined in the below author licence), an exclusive licence and/or a non-exclusive licence for contributions from authors who are: i) UK Crown employees; ii) where BMJ has agreed a CC-BY licence shall apply, and/or iii) in accordance with the terms applicable for US Federal Government officers or employees acting as part of their official duties; on a worldwide, perpetual, irrevocable, royalty-free basis to BMJ Publishing Group Ltd ("BMJ") its licensees and where the relevant Journal is co-owned by BMJ to the co-owners of the Journal, to publish the Work in this journal and any other BMJ products and to exploit all rights, as set out in our [licence](#).

The Submitting Author accepts and understands that any supply made under these terms is made by BMJ to the Submitting Author unless you are acting as an employee on behalf of your employer or a postgraduate student of an affiliated institution which is paying any applicable article publishing charge ("APC") for Open Access articles. Where the Submitting Author wishes to make the Work available on an Open Access basis (and intends to pay the relevant APC), the terms of reuse of such Open Access shall be governed by a Creative Commons licence – details of these licences and which [Creative Commons](#) licence will apply to this Work are set out in our licence referred to above.

Other than as permitted in any relevant BMJ Author's Self Archiving Policies, I confirm this Work has not been accepted for publication elsewhere, is not being considered for publication elsewhere and does not duplicate material already published. I confirm all authors consent to publication of this Work and authorise the granting of this licence.



## Title page

### Title

Early supported discharge for older adults admitted to hospital with medical complaints: a protocol for a systematic review

**Authors:** Susan Williams<sup>1</sup>, Ann-Marie Morrissey<sup>1</sup>, Fiona Steed<sup>2</sup>, Aoife Leahy<sup>1,2</sup>, Elaine Shanahan<sup>2</sup>, Catherine Peters<sup>2</sup>, Margaret O'Connor<sup>2,3</sup>, Rose Galvin<sup>1</sup>, C O'Riordan<sup>1</sup>

### Author Affiliations

<sup>1</sup>School of Allied Health, Faculty of Education and Health Sciences, Ageing Research Centre, Health Research Institute, University of Limerick, Ireland.

<sup>2</sup>Department of Ageing and Therapeutics, University Hospital Limerick, Dooradoyle, Limerick, Ireland

<sup>3</sup>Graduate Entry Medical School, Faculty of Education and Health Sciences, University of Limerick, Ireland

### Contact & Corresponding Author

Susan Williams, School of Allied Health, Faculty of Education and Health Sciences, Ageing Research Centre, Health Research Institute, University of Limerick, Ireland. Email: [susan.williams@ul.ie](mailto:susan.williams@ul.ie)

**Word Count:** 2,165

## Early supported discharge for older adults admitted to hospital with medical complaints: a protocol for a systematic review

### **Abstract**

**Introduction:** Early supported discharge (ESD) aims to link acute and community care, allowing hospital inpatients to return home and continue to receive the necessary input from healthcare professionals that they would otherwise receive in hospital. The concept has been researched extensively in the stroke population, showing reduced length of stay for patients and improved functional outcomes. This systematic review aims to explore the totality of evidence for the use of early supported discharge in an older adult population who have been hospitalised with medical complaints.

**Methods:** A systematic review of randomised controlled trials and quasi randomised controlled trials will be carried out in line with PRISMA guidelines. Studies will be included if they provide an early supported discharge intervention to older adults admitted to hospital for medical complaints compared to continuing inpatient care. MEDLINE, CINAHL, CENTRAL and EMBASE databases will be searched. The primary outcome measure will be length of hospital stay, secondary outcomes will include functional abilities, falls, quality of life, carer and patient satisfaction, unplanned emergency department re-presentation, unscheduled hospital readmission, nursing home admission or mortality. Titles and abstracts of studies will be screened independently by two authors. The Cochrane Risk of Bias Tool will be used independently by two reviewers to assess the methodological quality of the included studies. GRADE will be used to assess the quality of the body of evidence. A pooled meta-analysis will be conducted using RevMan software 5.4.1, depending on the uniformity of the data.

**Ethics & Dissemination:** The authors will present the findings of the review to a Patient and Public Involvement stakeholder panel of older people that has been established at the Ageing Research Centre in the University of Limerick. Formal ethical approval is not required for the review as all data collected will be secondary data and will be analysed anonymously.

**PROSPERO Registration:** CRD42021223112

1  
2  
3 **Keywords:** early supported discharge; older adults; hospitalised; systematic review; medical  
4 inpatient  
5  
6  
7  
8  
9

## 10 **Article Summary**

### 11 Strengths and Limitations

- 12 • This is the first systematic review to synthesise the totality of evidence in relation to  
13 the effectiveness of ESD on clinical and process outcomes in older adults with an acute  
14 medical admission
- 15 • Reporting is in accordance with the Preferred Reporting Items for Systematic Reviews  
16 and Meta-Analyses statement
- 17 • ESD interventions for stroke, surgical and elective hospital admissions will not be  
18 included
- 19 • Robust and transparent methods used to identify, select, appraise and synthesise  
20 findings
- 21 • The Cochrane Risk of Bias Tool and the GRADE Framework used to assess  
22 methodological quality
- 23
- 24
- 25
- 26
- 27
- 28
- 29
- 30
- 31
- 32
- 33
- 34
- 35
- 36
- 37
- 38
- 39
- 40
- 41
- 42
- 43
- 44
- 45
- 46
- 47
- 48
- 49
- 50
- 51
- 52
- 53
- 54
- 55
- 56
- 57
- 58
- 59
- 60

## Introduction

Globally, it is anticipated that the number of adults aged  $\geq 65$  years will increase from one billion in 2019, to 1.4 billion by 2030 and further increase to 2.1 billion by 2050 [1]. With an aging population globally, the number and frequency of older adults presenting to acute hospitals is increasing. These older adults are more likely to have multiple co-morbidities and as a result require more complex management. It is known that older adults are the largest consumers of healthcare resources, so as our global population ages, health services must adapt to support older adults in the hospital and community settings and across transitions of care [2].

Up to 60% of older adults who present to the emergency department (ED) are admitted for inpatient care as demonstrated in a retrospective cohort study of 550 older adults by Kennelly, Drumm [3]. Of those who were discharged home from the ED, 46.5% re-attended the ED within one year. Older adults functional ability is negatively correlated with older age and an increasing number of comorbidities [4]. In the two weeks prior to a hospital admission, half of older adults will have experienced a functional decline at home, most commonly assessed by their ability to carry out their activities of daily living [5]. Furthermore, a longer hospital length of stay (LoS) is associated with a greater likelihood of functional decline and reduced chances of recovering from the same. Loyd, Markland [6] reported that up to 30% (95% CI 24% - 33%) of older adults experience hospital associated disability in their meta-analysis of 15 longitudinal studies of older adults hospitalised in acute care. By reducing hospital length of stay for older adults, their functional abilities can be preserved and in turn reduce their risk of adverse outcomes such as falls or hospital re-admission.

Early supported discharge (ESD) is an acute hospital discharge intervention aimed at linking inpatient care and community services to allow patients to return home more than would be otherwise possible with community care, by receiving additional input from healthcare professionals [7]. ESD for people with acute stroke has been widely researched. A Cochrane review of 17 randomised controlled trials (RCT's) examining ESD in acute stroke care found it to decrease LoS by an average of six days, and also decrease admissions to long term care [7]. Those with mild-moderate disability (broadly defined as a Barthel Index score  $>9$  on initial assessment) made the greatest improvements. ESD has also been explored in surgical populations. Kapur, Thorpe [8] demonstrated a significant reduction in LoS among patients undergoing hip replacement in their controlled before-after study.

1  
2  
3 More recently, the impact of ESD has been examined on patient and process outcomes among  
4 older adults admitted to hospital with medical complaints. Parsons [9] conducted a RCT where  
5 an ESD intervention was provided to 97 older adults who were able to stand/transfer with  
6 maximum assistance of one for a maximum of six weeks when compared to routine care (n =  
7 86). The intervention resulted in an average reduction in LoS by six days versus the control  
8 group (mean difference = 5.9 days; 95% CI 0.6-11.3). Significant improvements were also  
9 observed in functional independence in patients.  
10  
11  
12  
13  
14

15  
16 The National Institute for Health and Care Excellence (NICE) published guidelines in 2015  
17 focusing on the transition between acute and community care for older adults with social care  
18 needs [10]. The guidelines highlight that families and carers can play an important role in the  
19 discharge process in terms of providing supplementary information about the patient's needs,  
20 which may decrease the risk of readmission to hospital. While carer outcomes (subjective  
21 health status, mood status and carer satisfaction) were analysed in the systematic review of  
22 ESD interventions for acute stroke care by Langhorne [7], the role of carers in assisting with  
23 an ESD intervention was not explicitly noted. However, research demonstrates that involving  
24 caregivers in the discharge process can reduce the risk of readmissions in older adults by 25%  
25 90 days post discharge and 24% 180 days post discharge [11]. As per these NICE guidelines,  
26 ESD is a discharge intervention model that would potentially reduce the risk of readmission,  
27 while inevitably involving families/caregivers in a shared decision-making process.  
28  
29  
30  
31  
32  
33  
34  
35  
36

37 From the literature discussed, it evident that ESD is well-established in the stroke population.  
38 The totality of evidence regarding the use of ESD in older adults hospitalised for medical  
39 reasons has not yet been reviewed. Therefore, the overall aim of this systematic review is to  
40 synthesise the evidence in relation to the effectiveness of ESD on clinical and process outcomes  
41 in hospitalised older adults with medical complaints.  
42  
43  
44  
45  
46  
47  
48  
49  
50

## 51 **Methods**

### 52 *Study Design*

53  
54 This protocol for a systematic review will be conducted in line with the PRISMA-P guidelines  
55 [12]. The systematic review will be reported following the PRISMA guidelines [13]. The  
56  
57  
58  
59  
60

1  
2  
3  
4  
5  
6  
7  
8  
9  
10  
11  
12  
13  
14  
15  
16  
17  
18  
19  
20  
21  
22  
23  
24  
25  
26  
27  
28  
29  
30  
31  
32  
33  
34  
35  
36  
37  
38  
39  
40  
41  
42  
43  
44  
45  
46  
47  
48  
49  
50  
51  
52  
53  
54  
55  
56  
57  
58  
59  
60

Cochrane Handbook for Systematic Reviews of Interventions will be adhered to as appropriate [14].

### *Study Identification*

Searches will be carried out in various databases including CINAHL in EBSCO, Cochrane Central Register of Controlled Trials in the Cochrane Library (CENTRAL), EMBASE and MEDLINE in EBSCO. MeSH terms and associated keywords will be used, covering broadly the topics of ESD (e.g. 'early supported discharge' and 'home rehabilitation'), older adults (e.g. 'aged' and 'aging') and acute care (e.g. 'hospital' and 'hospitalisation') and will be based off the search strategies used in Cochrane reviews carried out by Langhorne, Baylan [7] and Butterworth, Hays [15]. Sample search strategies can be seen in Appendices 1-4. Studies will be limited from the year 1997 onwards, as this was when the concept of ESD was introduced as an intervention in RCT's for stroke care [16, 17]. The reference lists of studies meeting the inclusion criteria will be hand reviewed for further relevant studies.

Studies will be included that meet the following eligibility criteria:

Population - older adults ( $\geq 65$  years) admitted to the acute care setting for an acute medical admission.

Studies will be excluded if their population has been admitted to hospital for non-medical reasons such as surgical/trauma, stroke care or elective admissions. Studies whose participants only presented to the ED and did not have a subsequent hospital admission will also be excluded.

Intervention - ESD intervention, described as interventions aimed to accelerate patient discharge from hospital once medically stable, and providing patients with the necessary input in the community at the same level of intensity and resources they would receive while in the inpatient setting [7].

Interventions which are not MDT-led or are carried out in step-down facilities will be excluded.

Control - usual care as described by study authors, other non-ESD interventions such as transfer to rehabilitation facilities or continuing multi-disciplinary team input in the inpatient setting, or an absence of ESD interventions.

1  
2  
3 Outcome - the primary outcome measure will be length of hospital stay. Secondary outcomes  
4 will include functional abilities (including Barthel Index), quality of life (including the SF-36),  
5 falls, injuries including fractures, carer and patient satisfaction, unplanned ED re-presentation,  
6 unscheduled hospital readmission, nursing home admission or mortality (the latter four  
7 outcomes measured by the number and frequency of each outcome as appropriate). Studies  
8 measuring any one or more of the primary or secondary outcomes will be included.  
9  
10  
11  
12

13  
14 RCT's (including cluster trials) and quasi-RCT's published from the year 1997 onwards will  
15 be included in this systematic review. Non-English articles will be included.  
16  
17  
18  
19  
20  
21  
22

### 23 *Study Selection*

24  
25 Studies will be downloaded in to Rayyan software and be screened against the eligibility  
26 criteria [18].  
27  
28  
29

30 Two authors (SW and CO'R) will independently screen relevant studies by title and abstract.  
31 Studies that are selected by the reviewers as possibly meeting the inclusion criteria will undergo  
32 a full text review. If a disagreement occurs, both authors will meet to come to a consensus. In  
33 the event that an agreement cannot be reached, a third author will be consulted (A-MM).  
34  
35  
36  
37  
38  
39

### 40 *Study Synthesis*

41  
42 Data will be independently extracted from the relevant studies by two reviewers (SW and A-  
43 MM). The information compiled will include study authors, year of publication, study  
44 population, interventions provided, controls provided, outcomes measured and duration of  
45 follow-up. Data describing the components of the ESD programmes will also be compiled in  
46 terms of resources allocated and service model used including inreach, outreach and discreet  
47 ESD models [19]. Data will be gathered into a pre-prepared Microsoft Excel document.  
48  
49  
50  
51  
52

53 A pooled meta-analysis will be carried out where the data are homogenous, which will be  
54 determined by the outcomes measured and the time points accessed across the included studies.  
55 The effect size will be determined where the outcomes measured in the included studies  
56 measure the same construct. To do so, the mean and standard deviations from the appropriate  
57 outcomes will be extracted from both intervention and control groups in all relevant studies.  
58  
59  
60

1  
2  
3 The median and interquartile range will be used in the event that the mean and standard  
4 deviation is not available [20]. For continuous data we will calculate the treatment effect using  
5 standardised mean differences (SMD) and 95% CI where different studies used different scales  
6 for the assessment of the same outcome, and using mean differences (MD) and 95% CI where  
7 studies have all used the same method of measuring outcome. For dichotomous variables we  
8 will calculate the treatment effect using a fixed-effect/random-effect model and report it as risk  
9 ratios (RR) with 95% confidence intervals (CI). Authors will be contacted in the event data is  
10 not available. Data for the meta-analysis will be analysed using RevMan 5.4.1 Software [21].  
11  
12  
13  
14  
15  
16  
17  
18  
19  
20  
21  
22

### 23 *Quality Assessment*

24  
25 Studies that meet the inclusion criteria will be assessed for risk of bias using the Cochrane Risk  
26 of Bias Tool [22]. Two independent reviewers (SW and RG) will assess the included studies  
27 for selection bias, performance bias, detection bias, attrition bias, reporting bias, other bias and  
28 the overall risk of bias.  
29  
30  
31

32 The GRADE framework will be used to assess the quality of evidence for each outcome  
33 measured [14]. Two independent reviewers (SW and RG) will assess the quality of each  
34 outcome across risk of bias, imprecision, inconsistency, indirectness and publication bias.  
35 Outcomes will be graded at one of four levels of evidence - very low, low, moderate and high.  
36 Although it may be considered a subjective measure in assessing quality of evidence, GRADE  
37 is a transparent and reproducible framework.  
38  
39  
40  
41  
42  
43  
44  
45

### 46 *Patient and Public Involvement*

47  
48 The authors will present the findings of the review to a Patient and Public Involvement (PPI)  
49 stakeholder panel of older people that has been established at the Ageing Research Centre in  
50 the University of Limerick. The focus of this session will be to discuss the findings with this  
51 group so that the discussion section of the paper can integrate the views and opinions of older  
52 people. The PPI group was not involved in the protocol development due to challenges arisen  
53 from the COVID-19 pandemic.  
54  
55  
56  
57  
58  
59  
60



### *Ethics & Dissemination*

Subsequently, the review will be published in a relevant peer-reviewed journal, following the PRISMA standardised reporting guidelines and through relevant conferences [13]. Formal ethical approval is not required for the review as all data collected will be secondary data and will be analysed anonymously.

### *Study Status*

Database searches have been completed.

## **Discussion**

This review will synthesise the evidence relating to the effectiveness of ESD for older adults who are admitted to hospital with medical complaints. It is proposed that the ESD interventions included in this review will identify the necessary components of an ESD programme in terms of staffing and resources. This will enable recommendations to be made in terms of current and future ESD programmes following evidence-based practice.

Strengths of this systematic review will include the stringent methods used in accordance with the PRISMA guidelines. The use of multiple authors in the article screening and selection further strengthens this review. Limitations may include high levels of heterogeneity in the included studies which may affect the ability to carry out a meta-analysis. In the event of additional relevant search terms being identified during the search, all search strategies will be re-run to include the newly identified terms.

By synthesising the evidence surrounding ESD in older adults and determining best practice, clinical and economic outcomes can be determined. There is potential for patient's LoS to be reduced as is the case in stroke care. Reducing LoS could potentially reduce the risk of functional decline among older adults and further reduce their risk of readmission to hospital, the need for nursing home care or death [23]. Determining the impact of ESD on hospital bed days and overall hospital costs will inform policy makers. Establishing the impact on patient clinical outcomes will inform guideline development relating to processes which enable older adults to live in their community safely for longer.

### Author Contributions

SW and RG were major contributors in writing the manuscript. SW, RG, A-MM and CO'R designed the overall study. SW developed the search strategy. SW, RG, A-MM, CO'R, MO'C, CP, ES, AL and FS participated in critically appraising and editing the manuscript. RG is the guarantor of the review. SW, RG, A-MM, CO'R, MO'C, CP, ES, AL and FS read and approved the final manuscript. The corresponding author attests that all listed authors meet authorship criteria and that no others meeting the criteria have been omitted.

### Funding

No funding was required.

### Conflicts of Interest

None declared.

### References

1. World Health Organisation, *Integrated care for older people: guidelines on community-level interventions to manage declines in intrinsic capacity*. 2017.
2. Olij, B.F., et al., *Economic evaluations of falls prevention programs for older adults: a systematic review*. Journal of the American Geriatrics Society, 2018. 66(11): p. 2197-2204.
3. Kennelly, S.P., et al., *Characteristics and outcomes of older persons attending the emergency department: a retrospective cohort study*. QJM, 2014. 107(12): p. 977-87.
4. Weng, C.F., et al., *Effects of depression, dementia and delirium on activities of daily living in elderly patients after discharge*. BMC Geriatr, 2019. 19(1): p. 261.
5. Zisberg, A., et al., *Hospital-Associated Functional Decline: The Role of Hospitalization Processes Beyond Individual Risk Factors*. Journal of the American Geriatrics Society (JAGS), 2015. 63(1): p. 55-62.
6. Loyd, C., et al., *Prevalence of Hospital-Associated Disability in Older Adults: A Meta-analysis*. J Am Med Dir Assoc, 2020. 21(4): p. 455-461 e5.

- 1  
2  
3 7. Langhorne, P., S. Baylan, and T. Early Supported Discharge, *Early supported*  
4 *discharge services for people with acute stroke*. Cochrane Database Syst Rev, 2017.  
5 7: p. CD000443.  
6  
7
- 8 8. Kapur, B., P. Thorpe, and M. Ramakrishnan. *Early supported discharge: improving*  
9 *care for fractured neck of femur patients*. in *Orthopaedic Proceedings*. 2016. The  
10 British Editorial Society of Bone & Joint Surgery.  
11
- 12 9. Parsons, M., et al., *Supported Discharge Teams for older people in hospital acute*  
13 *care: a randomised controlled trial*. Age Ageing, 2018. 47(2): p. 288-294.  
14
- 15 10. National Institute for Health and Care Excellence, *Transition between inpatient*  
16 *hospital settings and community or care home settings for adults with social care*  
17 *needs*. 2015.  
18
- 19 11. Rodakowski, J., et al., *Caregiver Integration During Discharge Planning for Older*  
20 *Adults to Reduce Resource Use: A Metaanalysis*. J Am Geriatr Soc, 2017. 65(8): p.  
21 1748-1755.  
22
- 23 12. Shamseer, L., et al., *Preferred reporting items for systematic review and meta-*  
24 *analysis protocols (PRISMA-P) 2015: elaboration and explanation*. BMJ, 2015. 2015  
25 Jan 2;349(jan02 1):g7647.  
26
- 27 13. Moher, D., et al., *Preferred Reporting Items for Systematic Reviews and Meta-*  
28 *Analyses: The PRISMA Statement*. 2009.  
29
- 30 14. Higgins, J., et al., *Cochrane Handbook for Systematic Reviews of Interventions,*  
31 *version 6.1 (updated September 2020)*. 2020.  
32
- 33 15. Butterworth, J.E., et al., *Interventions for involving older patients with multi-*  
34 *morbidity in decision-making during primary care consultations*. Cochrane Database  
35 Syst Rev, 2019. 2019(10).  
36
- 37 16. Rudd, A.G., et al., *Randomised controlled trial to evaluate early discharge scheme for*  
38 *patients with stroke*. Bmj, 1997. 315(7115): p. 1039-1044.  
39
- 40 17. Rodgers, H., et al., *Early supported hospital discharge following acute stroke: pilot*  
41 *study results*. Clinical rehabilitation, 1997. 11(4): p. 280-287.  
42
- 43 18. Ouzzani, M., et al., *Rayyan — a web and mobile app for systematic reviews*. . 2016.  
44
- 45 19. National Institute for Health and Care Excellence, *Stroke rehabilitation in adults*  
46 *(Clinical Guidance CG162)*. 2013.  
47
- 48 20. Wan, X., et al., *Estimating the sample mean and standard deviation from the sample*  
49 *size, median, range and/or interquartile range*. BMC medical research methodology,  
50 2014. 14(1): p. 135.  
51  
52  
53  
54  
55  
56  
57  
58  
59  
60

- 1
- 2
- 3
- 4 21. The Cochrane Collaboration, *Review Manager (Revman)*. Computer Program,
- 5 Version 5.4.1, 2020.
- 6
- 7 22. Higgins, J.P., et al., *Revised Cochrane risk-of-bias tool for randomized trials (RoB 2)*.
- 8 2019.
- 9
- 10 23. Grimmer, K., et al., *TRialing individualized interventions to prevent functional*
- 11 *decline in at-risk older adults (TRIIFL): study protocol for a randomized controlled*
- 12 *trial nested in a longitudinal observational study*. 2013.
- 13
- 14
- 15
- 16
- 17
- 18
- 19
- 20
- 21
- 22
- 23
- 24
- 25
- 26
- 27
- 28
- 29
- 30
- 31
- 32
- 33
- 34
- 35
- 36
- 37
- 38
- 39
- 40
- 41
- 42
- 43
- 44
- 45
- 46
- 47
- 48
- 49
- 50
- 51
- 52
- 53
- 54
- 55
- 56
- 57
- 58
- 59
- 60

For peer review only

## Appendix 1: Sample CENTRAL Search Strategy

#1 [mh 'aged']

#2 [mh 'aging']

#3 (late life OR elder\* OR aged OR old age OR geriatric OR seniors): ti/ab/kw

#4 (old OR older OR aging OR aged OR senior OR elder\*) NEAR/3 (person OR persons OR people OR adult\* OR subject\* OR patient\* OR consumer\* OR male OR males OR female\* OR men OR women): ti/ab/kw

#5 (OR #1-#4)

#6 [mh 'patient discharge']

#7 [mh 'progressive patient care']

#8 [mh 'home care services']

#9 [mh 'home care services, hospital-based']

#10 [mh 'home nursing']

#11 (early supported discharge OR ESD): ti/ab/kw

#12 ((early OR earlier OR prompt OR accelerate\* OR acute OR subacute OR supported) NEAR/5 discharg\*): ti/ab/kw

#13 (reduce\* NEAR/5 (duration OR length) NEAR/5 (stay OR hospital)): ti/ab/kw

#14 (reduce\* NEAR/5 (hospital OR inpatient OR in-patient) NEAR/5 (stay OR care)): ti/ab/kw

#15 'short-term ward': ti/ab/kw

#16 ((organi?ed OR multidisciplinary) NEAR/5 discharge NEAR/5 team\*): ti/ab/kw

#17 ((early OR earlier OR prompt OR accelerate\* OR supported) NEAR/5 return\* NEAR/2 home\*): ti/ab/kw

#18 (hospital\* NEAR/3 home\*): ti/ab/kw

#19 'hospital rehabilitation unit\*': ti/ab/kw

#20 (rehabilitation near/3 home\*): ti/ab/kw

#21 (intensive NEAR/2 home NEAR/5 (rehabilitation OR support\*)): ti/ab/kw

1  
2  
3 #22 (mobile NEAR/2 team\*): ti/ab/kw  
4

5 #23 ((post-discharge OR home rehabilitation) NEAR/5 (support\* OR care)): ti/ab/kw  
6

7  
8 #24 ((early OR earlier OR acute OR subacute OR post-discharge) NEAR/5 (community OR  
9 domiciliary OR primary care OR home OR home-based) NEAR/5 (rehabilitation OR support\*  
10 OR care)): ti/ab/kw  
11

12  
13  
14 #25 (OR #6-#24)  
15

16 #26 (#5 AND #25)  
17  
18

19  
20  
21 *Permission to re-use file by SW.*  
22  
23  
24  
25  
26  
27  
28  
29  
30  
31  
32  
33  
34  
35  
36  
37  
38  
39  
40  
41  
42  
43  
44  
45  
46  
47  
48  
49  
50  
51  
52  
53  
54  
55  
56  
57  
58  
59  
60

## Appendix 2: Sample MEDLINE Search Strategy

1. exp aged
2. Aging
3. (Late life OR elder\* OR aged OR old age OR geriatric OR seniors) ti/ab
4. ((old OR older OR aging OR aged OR senior OR elder\*) N3 (person OR persons OR people OR adult\* OR subject\* OR patient\* OR consumer\* OR male OR males OR female\* OR men OR women)) ti/ab
5. (1. OR 2. OR 3. OR 4.)
6. 'Patient Discharge' ti/ab
7. 'Progressive Patient Care' ti/ab
8. home care services OR home care services, hospital-based OR home nursing ti/ab
9. (early supported discharge OR ESD) ti/ab
10. ((early OR earlier OR prompt OR accelerate\* OR acute OR subacute OR supported) N5 discharg\*) ti/ab
11. (reduce\* N5 (duration OR length) N5 (stay OR hospital)) ti/ab
12. (reduce\* N5 (hospital OR inpatient OR in-patient) N5 (stay OR care)) ti/ab
13. 'short-term ward' ti/ab
14. ((organi?ed OR multidisciplinary) N5 discharge N5 team\*) ti/ab
15. ((early OR earlier OR prompt OR accelerate\$ OR supported) N5 return\* N2 home\*) ti/ab
16. (hospital\* N3 home\*) ti/ab
17. 'hospital rehabilitation unit\*' ti/ab
18. (rehabilitation N3 home\*) ti/ab
19. (intensive N2 home N5 (rehabilitation OR support\*)) ti/ab
20. (mobile N2 team\*) ti/ab
21. 'organi?ed home care' ti/ab

- 1
- 2
- 3 22. ((post-discharge OR home rehabilitation) N5 (support\* OR care)) ti/ab
- 4
- 5 23. ((early OR earlier OR acute OR subacute OR post-discharge) N5 (community OR
- 6 domiciliary OR primary care OR home OR home-based) N5 (rehabilitation OR support\* OR
- 7 care)) ti/ab
- 8
- 9
- 10
- 11 24. OR/6-23
- 12
- 13 25. 5 AND 24
- 14
- 15
- 16 26. randomi?ed controlled trials ti/ab
- 17
- 18 27. random allocation ti/ab
- 19
- 20
- 21 28. controlled clinical trials ti/ab
- 22
- 23 29. control groups ti/ab
- 24
- 25 30. clinical trials ti/ab
- 26
- 27 31. double-blind ti/ab
- 28
- 29 32. single-blind ti/ab
- 30
- 31 33. research design ti/ab
- 32
- 33 34. program evaluation ti/ab
- 34
- 35 35. randomi?ed controlled trial pt.
- 36
- 37 36. controlled clinical trial pt.
- 38
- 39 37. clinical trial pt.
- 40
- 41 38. random\* ti/ab
- 42
- 43 39. (controlled N5 (trial\* OR stud\*)) ti/ab
- 44
- 45 40. (clinical\* N5 trial\*) ti/ab
- 46
- 47 41. ((control OR treatment OR experiment\* OR intervention) N5 (group\* OR subject\* OR
- 48 patient\*)) ti/ab
- 49
- 50 42. (quasi-random\* OR quasi random\* OR pseudo-random\* OR pseudo random\*) ti/ab
- 51
- 52
- 53
- 54
- 55
- 56
- 57
- 58
- 59
- 60



1  
2  
3 43. ((control OR experiment\* OR conservative) N5 (treatment OR therapy OR procedure OR  
4 manage\*)) ti/ab  
5

6  
7 44. ((singl\* OR doubl\* OR tripl\* OR trebl\*) N5 (blind\* OR mask\*)) ti/ab  
8

9 45. (assign\* OR allocate\*) ti/ab  
10

11 46. controls ti/ab  
12

13 47. trial ti/ab  
14

15 48. OR/26-47  
16

17 49. 25 AND 48  
18  
19  
20  
21  
22  
23

24 *Permission to re-use file by SW.*  
25  
26  
27  
28  
29  
30  
31  
32  
33  
34  
35  
36  
37  
38  
39  
40  
41  
42  
43  
44  
45  
46  
47  
48  
49  
50  
51  
52  
53  
54  
55  
56  
57  
58  
59  
60

For Peer review only

### Appendix 3: Sample CINAHL Search Strategy

S1 (MH "Aged+")

S2 (MH "Aging+")

S3 TX (Late life OR elder\* OR aged OR old age OR geriatric OR seniors)

S4 TX ((old OR older OR aging OR aged OR senior OR elder\*) N3 (person OR persons OR people OR adult\* OR subject\* OR patient\* OR consumer\* OR male OR males OR female\* OR men OR women))

S5 S1 OR S2 OR S3 OR S4

S6 (MH "Home Health Care") OR (MH "Home Rehabilitation+") OR (MH "Home Nursing")

S7 ( TI ( (early OR earlier OR prompt OR accelerate\* OR acute OR subacute OR supported) ) AND TI discharge\* ) OR ( AB ( (early OR earlier OR prompt OR accelerate\* OR acute OR subacute OR supported) ) AND AB discharge\* )

S8 ( TI reduce\* AND TI ( (duration OR length) ) AND TI ( (stay OR hospital) ) ) OR ( AB reduce\* AND AB ( (duration OR length) ) AND AB ( (stay OR hospital) ) )

S9 ( TI reduc\* AND TI ( (hospital OR inpatient OR in-patient) ) AND TI ( (stay OR care) ) ) OR ( AB reduc\* AND AB ( (hospital OR inpatient OR inpatient) ) AND AB ( (stay OR care) ) )

S10 TI short-term ward OR AB short-term ward

S11 TI ( (organi?ed OR multidisciplinary) ) AND TI discharge AND TI team\*

S12 ( TI ( (organi?ed OR multidisciplinary) ) AND TI discharge AND TI team\* ) OR ( AB ( (organi?ed OR multidisciplinary) ) AND AB discharge AND AB team\* )

S13 ( TI ( (early OR earlier OR prompt OR accelerate\* OR supported) ) AND TI return\* AND TI home\* ) OR ( AB ( (early OR earlier OR prompt OR accelerate\* OR supported) ) AND AB return\* AND AB home\* )

S14 TI ( (hospital\* AND home\*) ) OR AB ( (hospital\* AND home\*) )

S15 TI hospital rehabilitation unit\* OR AB hospital rehabilitation unit\*

S16 TI ( (rehabilitation AND home\*) ) OR AB ( (rehabilitation AND home\*) )

1  
2  
3 S17 ( TI intensive AND TI home AND TI ( (rehabilitation OR support\*) ) )OR ( AB intensive  
4 AND AB home AND AB ( (rehabilitation or support\*) ) )

5  
6  
7 S18 TI ( (mobile AND team\*) ) OR AB ( (mobile AND team\*) )

8  
9 S19 TI organi?ed home care OR AB organi?ed home care

10  
11  
12 S20 ( TI ( (post-discharge OR home rehabilitation) ) AND TI ( (support\* OR care) ) ) OR ( AB  
13 ( (post-discharge OR home rehabilitation) ) AND AB ( (support\* OR care) ) )

14  
15  
16 S21 ( TI ( (early OR earlier OR acute OR subacute OR post-discharge) ) AND TI ( (community  
17 OR domiciliary OR primary care OR home OR homebased) ) AND TI ( (rehabilitation OR  
18 support\* OR care) ) ) OR ( AB ( (early OR earlier OR acute OR subacute OR post-discharge)  
19 ) AND AB ( (community OR domiciliary OR primary care OR home OR home-based) ) AND  
20 AB ( (rehabilitation OR support\* OR care) ) )

21  
22  
23 S22 S6 OR S7 OR S8 OR S9 OR S10 OR S11 OR S12 OR S13 OR S14 OR S15 OR S16 OR  
24 S17 OR S18 OR S19 OR S20 OR S21

25  
26  
27 S23 (MH "Randomized Controlled Trials") OR (MH "Random Assignment") OR (MH  
28 "Random Sample+")

29  
30 S24 (MH "Clinical Trials") OR (MH "Intervention Trials") OR (MH "Therapeutic Trials")

31  
32 S25 (MH "Double-Blind Studies") OR (MH "Single-Blind Studies") OR (MH "Triple-Blind  
33 Studies")

34  
35 S26 (MH "Control (Research)") OR (MH "Control Group") OR (MH "Placebos") OR (MH  
36 "Placebo Effect")

37  
38 S27 (MH "Crossover Design") OR (MH "Quasi-Experimental Studies")

39  
40 S28 PT (clinical trial OR randomized controlled trial)

41  
42 S29 TI (random\* OR RCT OR RCTs) OR AB (random\* OR RCT OR RCTs)

43  
44 S30 TI (controlled N5 (trial\* OR stud\*)) OR AB (controlled N5 (trial\* OR stud\*))

45  
46 S31 TI (clinical\* N5 trial\*) OR AB (clinical\* N5 trial\*)

47  
48 S32 TI ((control OR treatment OR experiment\* OR intervention) N5 (group\* OR subject\* OR  
49 patient\*)) OR AB ((control OR treatment OR experiment\* OR intervention) N5 (group\* OR  
50 subject\* OR patient\*))

1  
2  
3 S33 ((control OR experiment\* OR conservative) N5 (treatment OR therapy OR procedure OR  
4 manage\*)) OR AB ((control OR experiment\* OR conservative) N5 (treatment OR therapy OR  
5 procedure OR manage\*))  
6  
7

8  
9 S34 TI ((singl\* OR doubl\* OR tripl\* OR trebl\*) N5 (blind\* OR mask\*)) OR AB ((singl\* OR  
10 doubl\* OR tripl\* OR trebl\*) N5 (blind\* OR mask\*))  
11  
12

13 S35 TI (cross-over OR cross over OR crossover) or AB (cross-over OR cross over OR  
14 crossover)  
15  
16

17 S36 TI (placebo\* OR sham) or AB (placebo\* OR sham)  
18  
19

20 S37 TI trial  
21

22 S38 TI (assign\* OR allocat\*) OR AB (assign\* OR allocat\*)  
23  
24

25 S39 TI controls OR AB controls  
26

27 S40 TI (quasi-random\* OR quasi random\* OR pseudo-random\* OR pseudo random\*) OR AB  
28 (quasi-random\* OR quasi random\* OR pseudorandom\* OR pseudo random\*)  
29  
30

31 S41 S23 OR S24 OR S25 OR S26 OR S27 OR S28 OR S29 OR S30 OR S31 OR S32 OR S33  
32 OR S34 OR S35 OR S36 OR S37 OR S38 OR S39 OR S40  
33  
34

35 S42 S5 AND S22 AND S41  
36  
37  
38

39 *Permission to re-use file by SW.*  
40  
41  
42  
43  
44  
45  
46  
47  
48  
49  
50  
51  
52  
53  
54  
55  
56  
57  
58  
59  
60

#### Appendix 4: Sample EMBASE Search Strategy

1. aged
2. exp aging
3. (Late life OR elder\* OR aged OR old age OR geriatric OR seniors) ti/ab/kw
4. ((old OR older OR aging OR aged OR senior OR elder\*) NEAR/3 (person OR persons OR people OR adult\* OR subject\* OR patient\* OR consumer\* OR male OR males OR female\* OR men OR women)) ti/ab/kw
5. OR/1-4
6. 'hospital discharge' ti/ab/kw
7. 'early supported discharge' ti/ab/kw
8. 'progressive patient care' ti/ab/kw
9. 'home care' OR 'home physiotherapy' OR 'home rehabilitation' ti/ab/kw
10. 'home environment' ti/ab/kw
11. 'community based rehabilitation' ti/ab/kw
12. (early supported discharge OR ESD) ti/ab/kw
13. ((early OR earlier OR prompt OR accelerate\$ OR acute OR subacute OR supported) NEAR/5 discharg\$) ti/ab/kw
14. (reduce\$ NEAR/5 (duration OR length) NEAR/5 (stay OR hospital)) ti/ab/kw
15. (reduce\$ NEAR/5 (hospital OR inpatient OR in-patient) NEAR/5 (stay OR care)) ti/ab/kw
16. short-term ward ti/ab/kw
17. ((organi?ed OR multidisciplinary) NEAR/5 discharge NEAR/5 team\$) ti/ab/kw
18. ((early OR earlier OR prompt OR accelerate\$ OR supported) NEAR/5 return\$ NEAR/2 home\$) ti/ab/kw
19. (hospital\$ NEAR/3 home\$) ti/ab/kw
20. hospital rehabilitation unit\$ ti/ab/kw

- 1
- 2
- 3 21. (rehabilitation NEAR/3 home\$) ti/ab/kw
- 4
- 5 22. (intensive NEAR/2 home NEAR/5 (rehabilitation OR support\$)) ti/ab/kw
- 6
- 7
- 8 23. (mobile NEAR/2 team\$) ti/ab/kw
- 9
- 10 24. organi?ed home care ti/ab/kw
- 11
- 12
- 13 25. ((post-discharge OR home rehabilitation) NEAR/5 (support\$ OR care)) ti/ab/kw
- 14
- 15 26. ((early OR earlier OR acute OR subacute OR post-discharge) NEAR/5 (community OR
- 16 domiciliary OR primary care OR home OR home-based) NEAR/5 (rehabilitation OR support\$
- 17 OR care)) ti/ab/kw
- 18
- 19
- 20
- 21 27. OR/6-26
- 22
- 23 28. 'Randomi?ed Controlled Trial' ti/ab/kw
- 24
- 25
- 26 29. Randomi?ation ti/ab/kw
- 27
- 28 30. 'Controlled Study' ti/ab/kw
- 29
- 30
- 31 31. 'control group' ti/ab/kw
- 32
- 33 32. 'clinical trial' OR 'phase 1 clinical trial' OR 'phase 2 clinical trial' OR 'phase 3 clinical
- 34 trial' OR 'phase 4 clinical trial' OR 'controlled clinical trial' ti/ab/kw
- 35
- 36
- 37 33. 'Double Blind Procedure' ti/ab/kw
- 38
- 39 34. 'Single Blind Procedure' OR 'triple blind procedure' ti/ab/kw
- 40
- 41
- 42 35. 'Parallel Design' ti/ab/kw
- 43
- 44 36. random\$ ti/ab/kw
- 45
- 46 37. (controlled NEAR/5 (trial\$ OR stud\$)) ti/ab/kw
- 47
- 48
- 49 38. (clinical\$ NEAR/5 trial\$) ti/ab/kw
- 50
- 51 39. ((control OR treatment OR experiment\$ OR intervention) NEAR/5 (group\$ OR subject\$
- 52 OR patient\$)) ti/ab/kw
- 53
- 54
- 55 40. ((control OR experiment\$ OR conservative) NEAR/5 (treatment OR therapy OR procedure
- 56 OR manage\$)) ti/ab/kw
- 57
- 58
- 59 41. ((singl\$ OR doubl\$ OR tripl\$ OR trebl\$) NEAR/5 (blind\$ OR mask\$)) ti/ab/kw
- 60

1  
2  
3 42. (assign\$ OR alternate OR allocat\$ OR counterbalance\$ OR multiple baseline) ti/ab/kw  
4

5 43. controls ti/ab/kw  
6

7 44. trial ti/ab/kw  
8

9 45. OR/28-44  
10

11 46. 5 AND 27 AND 45  
12  
13  
14  
15  
16

17 *Permission to re-use file by SW.*  
18  
19  
20  
21  
22  
23  
24  
25  
26  
27  
28  
29  
30  
31  
32  
33  
34  
35  
36  
37  
38  
39  
40  
41  
42  
43  
44  
45  
46  
47  
48  
49  
50  
51  
52  
53  
54  
55  
56  
57  
58  
59  
60

# Reporting checklist for protocol of a systematic review.

Based on the PRISMA-P guidelines.

## Instructions to authors

Complete this checklist by entering the page numbers from your manuscript where readers will find each of the items listed below.

Your article may not currently address all the items on the checklist. Please modify your text to include the missing information. If you are certain that an item does not apply, please write "n/a" and provide a short explanation.

Upload your completed checklist as an extra file when you submit to a journal.

In your methods section, say that you used the PRISMA-Reporting guidelines, and cite them as:

Moher D, Shamseer L, Clarke M, Ghersi D, Liberati A, Petticrew M, Shekelle P, Stewart LA. Preferred Reporting Items for Systematic Review and Meta-Analysis Protocols (PRISMA-P) 2015 statement. Syst Rev. 2015;4(1):1.

|                |                     | Reporting Item                                                                     | Page Number                            |
|----------------|---------------------|------------------------------------------------------------------------------------|----------------------------------------|
| <b>Title</b>   |                     |                                                                                    |                                        |
| Identification | <a href="#">#1a</a> | Identify the report as a protocol of a systematic review                           | 1                                      |
| Update         | <a href="#">#1b</a> | If the protocol is for an update of a previous systematic review, identify as such | N/A - this is the first review of this |



intervention in this  
population group

## Registration

[#2](#) If registered, provide the name of the registry (such as PROSPERO) and registration number 2

## Authors

[#3a](#) Provide name, institutional affiliation, e-mail address of all protocol authors; provide physical mailing address of corresponding author 1

[#3b](#) Describe contributions of protocol authors and identify the guarantor of the review 10

## Amendments

[#4](#) If the protocol represents an amendment of a previously completed or published protocol, identify as such and list changes; otherwise, state plan for documenting important protocol amendments N/A

## Support

[#5a](#) Indicate sources of financial or other support for the review 10

[#5b](#) Provide name for the review funder and / or sponsor N/A - no funding was given

[#5c](#) Describe roles of funder(s), sponsor(s), and / or N/A - no funding was

|    |                      |                      |                                                        |                |
|----|----------------------|----------------------|--------------------------------------------------------|----------------|
| 1  | or funder            |                      | institution(s), if any, in developing the protocol     | given          |
| 2  |                      |                      |                                                        |                |
| 3  |                      |                      |                                                        |                |
| 4  | <b>Introduction</b>  |                      |                                                        |                |
| 5  |                      |                      |                                                        |                |
| 6  |                      |                      |                                                        |                |
| 7  | Rationale            | <a href="#">#6</a>   | Describe the rationale for the review in the context   | 4-5            |
| 8  |                      |                      | of what is already known                               |                |
| 9  |                      |                      |                                                        |                |
| 10 |                      |                      |                                                        |                |
| 11 |                      |                      |                                                        |                |
| 12 | Objectives           | <a href="#">#7</a>   | Provide an explicit statement of the question(s) the   | 5              |
| 13 |                      |                      | review will address with reference to participants,    |                |
| 14 |                      |                      | interventions, comparators, and outcomes (PICO)        |                |
| 15 |                      |                      |                                                        |                |
| 16 |                      |                      |                                                        |                |
| 17 |                      |                      |                                                        |                |
| 18 |                      |                      |                                                        |                |
| 19 | <b>Methods</b>       |                      |                                                        |                |
| 20 |                      |                      |                                                        |                |
| 21 |                      |                      |                                                        |                |
| 22 |                      |                      |                                                        |                |
| 23 | Eligibility criteria | <a href="#">#8</a>   | Specify the study characteristics (such as PICO,       | 6-7            |
| 24 |                      |                      | study design, setting, time frame) and report          |                |
| 25 |                      |                      | characteristics (such as years considered,             |                |
| 26 |                      |                      | language, publication status) to be used as criteria   |                |
| 27 |                      |                      | for eligibility for the review                         |                |
| 28 |                      |                      |                                                        |                |
| 29 |                      |                      |                                                        |                |
| 30 |                      |                      |                                                        |                |
| 31 |                      |                      |                                                        |                |
| 32 |                      |                      |                                                        |                |
| 33 |                      |                      |                                                        |                |
| 34 |                      |                      |                                                        |                |
| 35 | Information          | <a href="#">#9</a>   | Describe all intended information sources (such as     | 6              |
| 36 | sources              |                      | electronic databases, contact with study authors,      |                |
| 37 |                      |                      | trial registers or other grey literature sources) with |                |
| 38 |                      |                      | planned dates of coverage                              |                |
| 39 |                      |                      |                                                        |                |
| 40 |                      |                      |                                                        |                |
| 41 |                      |                      |                                                        |                |
| 42 |                      |                      |                                                        |                |
| 43 |                      |                      |                                                        |                |
| 44 |                      |                      |                                                        |                |
| 45 | Search strategy      | <a href="#">#10</a>  | Present draft of search strategy to be used for at     | Appendices 1-4 |
| 46 |                      |                      | least one electronic database, including planned       |                |
| 47 |                      |                      | limits, such that it could be repeated                 |                |
| 48 |                      |                      |                                                        |                |
| 49 |                      |                      |                                                        |                |
| 50 |                      |                      |                                                        |                |
| 51 |                      |                      |                                                        |                |
| 52 | Study records -      | <a href="#">#11a</a> | Describe the mechanism(s) that will be used to         | 7-8            |
| 53 | data                 |                      | manage records and data throughout the review          |                |
| 54 |                      |                      |                                                        |                |
| 55 |                      |                      |                                                        |                |
| 56 |                      |                      |                                                        |                |
| 57 | management           |                      |                                                        |                |
| 58 |                      |                      |                                                        |                |
| 59 |                      |                      |                                                        |                |
| 60 |                      |                      |                                                        |                |

|    |                    |                      |                                                         |     |
|----|--------------------|----------------------|---------------------------------------------------------|-----|
| 1  | Study records -    | <a href="#">#11b</a> | State the process that will be used for selecting       | 7-8 |
| 2  |                    |                      |                                                         |     |
| 3  | selection process  |                      | studies (such as two independent reviewers)             |     |
| 4  |                    |                      |                                                         |     |
| 5  |                    |                      | through each phase of the review (that is,              |     |
| 6  |                    |                      | screening, eligibility and inclusion in meta-analysis)  |     |
| 7  |                    |                      |                                                         |     |
| 8  |                    |                      |                                                         |     |
| 9  |                    |                      |                                                         |     |
| 10 |                    |                      |                                                         |     |
| 11 | Study records -    | <a href="#">#11c</a> | Describe planned method of extracting data from         | 7-8 |
| 12 |                    |                      |                                                         |     |
| 13 | data collection    |                      | reports (such as piloting forms, done                   |     |
| 14 |                    |                      |                                                         |     |
| 15 | process            |                      | independently, in duplicate), any processes for         |     |
| 16 |                    |                      |                                                         |     |
| 17 |                    |                      | obtaining and confirming data from investigators        |     |
| 18 |                    |                      |                                                         |     |
| 19 |                    |                      |                                                         |     |
| 20 |                    |                      |                                                         |     |
| 21 | Data items         | <a href="#">#12</a>  | List and define all variables for which data will be    | 8   |
| 22 |                    |                      |                                                         |     |
| 23 |                    |                      | sought (such as PICO items, funding sources), any       |     |
| 24 |                    |                      |                                                         |     |
| 25 |                    |                      | pre-planned data assumptions and simplifications        |     |
| 26 |                    |                      |                                                         |     |
| 27 |                    |                      |                                                         |     |
| 28 |                    |                      |                                                         |     |
| 29 | Outcomes and       | <a href="#">#13</a>  | List and define all outcomes for which data will be     | 7   |
| 30 |                    |                      |                                                         |     |
| 31 | prioritization     |                      | sought, including prioritization of main and            |     |
| 32 |                    |                      |                                                         |     |
| 33 |                    |                      | additional outcomes, with rationale                     |     |
| 34 |                    |                      |                                                         |     |
| 35 |                    |                      |                                                         |     |
| 36 | Risk of bias in    | <a href="#">#14</a>  | Describe anticipated methods for assessing risk of      | 8   |
| 37 |                    |                      |                                                         |     |
| 38 | individual studies |                      | bias of individual studies, including whether this will |     |
| 39 |                    |                      |                                                         |     |
| 40 |                    |                      | be done at the outcome or study level, or both;         |     |
| 41 |                    |                      |                                                         |     |
| 42 |                    |                      | state how this information will be used in data         |     |
| 43 |                    |                      |                                                         |     |
| 44 |                    |                      | synthesis                                               |     |
| 45 |                    |                      |                                                         |     |
| 46 |                    |                      |                                                         |     |
| 47 |                    |                      |                                                         |     |
| 48 | Data synthesis     | <a href="#">#15a</a> | Describe criteria under which study data will be        | 8   |
| 49 |                    |                      |                                                         |     |
| 50 |                    |                      | quantitatively synthesised                              |     |
| 51 |                    |                      |                                                         |     |
| 52 |                    |                      |                                                         |     |
| 53 |                    |                      |                                                         |     |
| 54 | Data synthesis     | <a href="#">#15b</a> | If data are appropriate for quantitative synthesis,     | 8   |
| 55 |                    |                      |                                                         |     |
| 56 |                    |                      | describe planned summary measures, methods of           |     |
| 57 |                    |                      |                                                         |     |
| 58 |                    |                      |                                                         |     |
| 59 |                    |                      |                                                         |     |
| 60 |                    |                      |                                                         |     |

handling data and methods of combining data from studies, including any planned exploration of consistency (such as I<sup>2</sup>, Kendall's  $\tau$ )

|    |                |                      |                                                   |
|----|----------------|----------------------|---------------------------------------------------|
| 1  |                |                      |                                                   |
| 2  |                |                      |                                                   |
| 3  |                |                      |                                                   |
| 4  |                |                      |                                                   |
| 5  |                |                      |                                                   |
| 6  |                |                      |                                                   |
| 7  |                |                      |                                                   |
| 8  | Data synthesis | <a href="#">#15c</a> | Describe any proposed additional analyses (such   |
| 9  |                |                      |                                                   |
| 10 |                |                      |                                                   |
| 11 |                |                      |                                                   |
| 12 |                |                      |                                                   |
| 13 |                |                      |                                                   |
| 14 |                |                      |                                                   |
| 15 |                |                      |                                                   |
| 16 | Data synthesis | <a href="#">#15d</a> | If quantitative synthesis is not appropriate,     |
| 17 |                |                      |                                                   |
| 18 |                |                      |                                                   |
| 19 |                |                      |                                                   |
| 20 |                |                      |                                                   |
| 21 | Meta-bias(es)  | <a href="#">#16</a>  | Specify any planned assessment of meta-bias(es)   |
| 22 |                |                      |                                                   |
| 23 |                |                      |                                                   |
| 24 |                |                      |                                                   |
| 25 |                |                      |                                                   |
| 26 |                |                      |                                                   |
| 27 |                |                      |                                                   |
| 28 |                |                      |                                                   |
| 29 | Confidence in  | <a href="#">#17</a>  | Describe how the strength of the body of evidence |
| 30 | cumulative     |                      | will be assessed (such as GRADE)                  |
| 31 | evidence       |                      |                                                   |
| 32 |                |                      |                                                   |
| 33 |                |                      |                                                   |
| 34 |                |                      |                                                   |
| 35 |                |                      |                                                   |

#### Notes:

- 1b: N/A - this is the first review of this intervention in this population group
- 5b: N/A - no funding was given
- 5c: N/A - no funding was given
- 10: Appendices 1-4 The PRISMA-P checklist is distributed under the terms of the Creative Commons Attribution License CC-BY 4.0. This checklist was completed on 24. January 2021 using <https://www.goodreports.org/>, a tool made by the [EQUATOR Network](#) in collaboration with [Penelope.ai](#)
