# Supplementary material for: Early supported discharge for older adults admitted to hospital with medical complaints: a protocol for a systematic review
Source: PubMed Central journal article supplement — BMJ Open. 2021 Oct 28;11(10):e049297. doi: 10.1136/bmjopen-2021-049297 (PMC8557271; doi:10.1136/bmjopen-2021-049297), 2021-10-28
Supplement: bmjopen-2021-049297supp001.pdf [file bmjopen-2021-049297supp001.pdf]

## Appendix 1: Sample CENTRAL Search Strategy

#1 [mh 'aged']

#2 [mh 'aging']

#3 (late life OR elder\* OR aged OR old age OR geriatric OR seniors): ti/ab/kw

#4 (old OR older OR aging OR aged OR senior OR elder\*) NEAR/3 (person OR persons OR people OR adult\* OR subject\* OR patient\* OR consumer\* OR male OR males OR female\* OR men OR women): ti/ab/kw

#5 (OR #1-#4)

#6 [mh 'patient discharge']

#7 [mh 'progressive patient care']

#8 [mh 'home care services']

#9 [mh 'home care services, hospital-based']

#10 [mh 'home nursing']

#11 (early supported discharge OR ESD): ti/ab/kw

#12 ((early OR earlier OR prompt OR accelerate\* OR acute OR subacute OR supported) NEAR/5 discharg\*): ti/ab/kw

#13 (reduce\* NEAR/5 (duration OR length) NEAR/5 (stay OR hospital)): ti/ab/kw

#14 (reduce\* NEAR/5 (hospital OR inpatient OR in-patient) NEAR/5 (stay OR care)): ti/ab/kw

#15 'short-term ward': ti/ab/kw

#16 ((organi?ed OR multidisciplinary) NEAR/5 discharge NEAR/5 team\*): ti/ab/kw

#17 ((early OR earlier OR prompt OR accelerate\* OR supported) NEAR/5 return\* NEAR/2 home\*): ti/ab/kw

#18 (hospital\* NEAR/3 home\*): ti/ab/kw

#19 'hospital rehabilitation unit\*': ti/ab/kw

#20 (rehabilitation near/3 home\*): ti/ab/kw

#21 (intensive NEAR/2 home NEAR/5 (rehabilitation OR support\*)): ti/ab/kw

#22 (mobile NEAR/2 team\*): ti/ab/kw

#23 ((post-discharge OR home rehabilitation) NEAR/5 (support\* OR care)): ti/ab/kw

#24 ((early OR earlier OR acute OR subacute OR post-discharge) NEAR/5 (community OR domiciliary OR primary care OR home OR home-based) NEAR/5 (rehabilitation OR support\* OR care)): ti/ab/kw

#25 (OR #6-#24)

#26 (#5 AND #25)

*Permission to re-use file by SW.*
