# Supplementary material for: Early supported discharge for older adults admitted to hospital with medical complaints: a protocol for a systematic review
Source: PubMed Central journal article supplement — BMJ Open. 2021 Oct 28;11(10):e049297. doi: 10.1136/bmjopen-2021-049297 (PMC8557271; doi:10.1136/bmjopen-2021-049297), 2021-10-28
Supplement: bmjopen-2021-049297supp002.pdf [file bmjopen-2021-049297supp002.pdf]

## Appendix 2: Sample MEDLINE Search Strategy

1. exp aged
2. Aging
3. (Late life OR elder\* OR aged OR old age OR geriatric OR seniors) ti/ab
4. ((old OR older OR aging OR aged OR senior OR elder\*) N3 (person OR persons OR people OR adult\* OR subject\* OR patient\* OR consumer\* OR male OR males OR female\* OR men OR women)) ti/ab
5. (1. OR 2. OR 3. OR 4.)
6. 'Patient Discharge' ti/ab
7. 'Progressive Patient Care' ti/ab
8. home care services OR home care services, hospital-based OR home nursing ti/ab
9. (early supported discharge OR ESD) ti/ab
10. ((early OR earlier OR prompt OR accelerate\* OR acute OR subacute OR supported) N5 discharg\*) ti/ab
11. (reduce\* N5 (duration OR length) N5 (stay OR hospital)) ti/ab
12. (reduce\* N5 (hospital OR inpatient OR in-patient) N5 (stay OR care)) ti/ab
13. 'short-term ward' ti/ab
14. ((organi?ed OR multidisciplinary) N5 discharge N5 team\*) ti/ab
15. ((early OR earlier OR prompt OR accelerate\$ OR supported) N5 return\* N2 home\*) ti/ab
16. (hospital\* N3 home\*) ti/ab
17. 'hospital rehabilitation unit\*' ti/ab
18. (rehabilitation N3 home\*) ti/ab
19. (intensive N2 home N5 (rehabilitation OR support\*)) ti/ab
20. (mobile N2 team\*) ti/ab
21. 'organi?ed home care' ti/ab

22. ((post-discharge OR home rehabilitation) N5 (support\* OR care)) ti/ab
23. ((early OR earlier OR acute OR subacute OR post-discharge) N5 (community OR domiciliary OR primary care OR home OR home-based) N5 (rehabilitation OR support\* OR care)) ti/ab
24. OR/6-23
25. 5 AND 24
26. randomi?ed controlled trials ti/ab
27. random allocation ti/ab
28. controlled clinical trials ti/ab
29. control groups ti/ab
30. clinical trials ti/ab
31. double-blind ti/ab
32. single-blind ti/ab
33. research design ti/ab
34. program evaluation ti/ab
35. randomi?ed controlled trial pt.
36. controlled clinical trial pt.
37. clinical trial pt.
38. random\* ti/ab
39. (controlled N5 (trial\* OR stud\*)) ti/ab
40. (clinical\* N5 trial\*) ti/ab
41. ((control OR treatment OR experiment\* OR intervention) N5 (group\* OR subject\* OR patient\*)) ti/ab
42. (quasi-random\* OR quasi random\* OR pseudo-random\* OR pseudo random\*) ti/ab

43. ((control OR experiment\* OR conservative) N5 (treatment OR therapy OR procedure OR manage\*)) ti/ab
44. ((singl\* OR doubl\* OR tripl\* OR trebl\*) N5 (blind\* OR mask\*)) ti/ab
45. (assign\* OR allocate\*) ti/ab
46. controls ti/ab
47. trial ti/ab
48. OR/26-47
49. 25 AND 48

*Permission to re-use file by SW.*
