# Supplementary material for: Early supported discharge for older adults admitted to hospital with medical complaints: a protocol for a systematic review
Source: PubMed Central journal article supplement — BMJ Open. 2021 Oct 28;11(10):e049297. doi: 10.1136/bmjopen-2021-049297 (PMC8557271; doi:10.1136/bmjopen-2021-049297), 2021-10-28
Supplement: bmjopen-2021-049297supp003.pdf [file bmjopen-2021-049297supp003.pdf]

### Appendix 3: Sample CINAHL Search Strategy

S1 (MH "Aged+")

S2 (MH "Aging+")

S3 TX (Late life OR elder\* OR aged OR old age OR geriatric OR seniors)

S4 TX ((old OR older OR aging OR aged OR senior OR elder\*) N3 (person OR persons OR people OR adult\* OR subject\* OR patient\* OR consumer\* OR male OR males OR female\* OR men OR women))

S5 S1 OR S2 OR S3 OR S4

S6 (MH "Home Health Care") OR (MH "Home Rehabilitation+") OR (MH "Home Nursing")

S7 ( TI ( (early OR earlier OR prompt OR accelerate\* OR acute OR subacute OR supported) ) AND TI discharge\* ) OR ( AB ( (early OR earlier OR prompt OR accelerate\* OR acute OR subacute OR supported) ) AND AB discharge\* )

S8 ( TI reduce\* AND TI ( (duration OR length) ) AND TI ( (stay OR hospital) ) ) OR ( AB reduce\* AND AB ( (duration OR length) ) AND AB ( (stay OR hospital) ) )

S9 ( TI reduc\* AND TI ( (hospital OR inpatient OR in-patient) ) AND TI ( (stay OR care) ) ) OR ( AB reduc\* AND AB ( (hospital OR inpatient OR inpatient) ) AND AB ( (stay OR care) ) )

S10 TI short-term ward OR AB short-term ward

S11 TI ( (organi?ed OR multidisciplinary) ) AND TI discharge AND TI team\*

S12 ( TI ( (organi?ed OR multidisciplinary) ) AND TI discharge AND TI team\* ) OR ( AB ( (organi?ed OR multidisciplinary) ) AND AB discharge AND AB team\* )

S13 ( TI ( (early OR earlier OR prompt OR accelerate\* OR supported) ) AND TI return\* AND TI home\* ) OR ( AB ( (early OR earlier OR prompt OR accelerate\* OR supported) ) AND AB return\* AND AB home\* )

S14 TI ( (hospital\* AND home\*) ) OR AB ( (hospital\* AND home\*) )

S15 TI hospital rehabilitation unit\* OR AB hospital rehabilitation unit\*

S16 TI ( (rehabilitation AND home\*) ) OR AB ( (rehabilitation AND home\*) )

S17 ( TI intensive AND TI home AND TI ( (rehabilitation OR support\*) ) )OR ( AB intensive AND AB home AND AB ( (rehabilitation or support\*) ) )

S18 TI ( (mobile AND team\*) ) OR AB ( (mobile AND team\*) )

S19 TI organi?ed home care OR AB organi?ed home care

S20 ( TI ( (post-discharge OR home rehabilitation) ) AND TI ( (support\* OR care) ) ) OR ( AB ( (post-discharge OR home rehabilitation) ) AND AB ( (support\* OR care) ) )

S21 ( TI ( (early OR earlier OR acute OR subacute OR post-discharge) ) AND TI ( (community OR domiciliary OR primary care OR home OR homebased) ) AND TI ( (rehabilitation OR support\* OR care) ) ) OR ( AB ( (early OR earlier OR acute OR subacute OR post-discharge) ) AND AB ( (community OR domiciliary OR primary care OR home OR home-based) ) AND AB ( (rehabilitation OR support\* OR care) ) )

S22 S6 OR S7 OR S8 OR S9 OR S10 OR S11 OR S12 OR S13 OR S14 OR S15 OR S16 OR S17 OR S18 OR S19 OR S20 OR S21

S23 (MH "Randomized Controlled Trials") OR (MH "Random Assignment") OR (MH "Random Sample+")

S24 (MH "Clinical Trials") OR (MH "Intervention Trials") OR (MH "Therapeutic Trials")

S25 (MH "Double-Blind Studies") OR (MH "Single-Blind Studies") OR (MH "Triple-Blind Studies")

S26 (MH "Control (Research)") OR (MH "Control Group") OR (MH "Placebos") OR (MH "Placebo Effect")

S27 (MH "Crossover Design") OR (MH "Quasi-Experimental Studies")

S28 PT (clinical trial OR randomized controlled trial)

S29 TI (random\* OR RCT OR RCTs) OR AB (random\* OR RCT OR RCTs)

S30 TI (controlled N5 (trial\* OR stud\*)) OR AB (controlled N5 (trial\* OR stud\*))

S31 TI (clinical\* N5 trial\*) OR AB (clinical\* N5 trial\*)

S32 TI ((control OR treatment OR experiment\* OR intervention) N5 (group\* OR subject\* OR patient\*)) OR AB ((control OR treatment OR experiment\* OR intervention) N5 (group\* OR subject\* OR patient\*))

S33 ((control OR experiment\* OR conservative) N5 (treatment OR therapy OR procedure OR manage\*)) OR AB ((control OR experiment\* OR conservative) N5 (treatment OR therapy OR procedure OR manage\*))

S34 TI ((singl\* OR doubl\* OR tripl\* OR trebl\*) N5 (blind\* OR mask\*)) OR AB ((singl\* OR doubl\* OR tripl\* OR trebl\*) N5 (blind\* OR mask\*))

S35 TI (cross-over OR cross over OR crossover) or AB (cross-over OR cross over OR crossover)

S36 TI (placebo\* OR sham) or AB (placebo\* OR sham)

S37 TI trial

S38 TI (assign\* OR allocat\*) OR AB (assign\* OR allocat\*)

S39 TI controls OR AB controls

S40 TI (quasi-random\* OR quasi random\* OR pseudo-random\* OR pseudo random\*) OR AB (quasi-random\* OR quasi random\* OR pseudorandom\* OR pseudo random\*)

S41 S23 OR S24 OR S25 OR S26 OR S27 OR S28 OR S29 OR S30 OR S31 OR S32 OR S33 OR S34 OR S35 OR S36 OR S37 OR S38 OR S39 OR S40

S42 S5 AND S22 AND S41

*Permission to re-use file by SW.*
