# Supplementary material for: Early supported discharge for older adults admitted to hospital with medical complaints: a protocol for a systematic review
Source: PubMed Central journal article supplement — BMJ Open. 2021 Oct 28;11(10):e049297. doi: 10.1136/bmjopen-2021-049297 (PMC8557271; doi:10.1136/bmjopen-2021-049297), 2021-10-28
Supplement: bmjopen-2021-049297supp004.pdf [file bmjopen-2021-049297supp004.pdf]

#### Appendix 4: Sample EMBASE Search Strategy

1. aged
2. exp aging
3. (Late life OR elder\* OR aged OR old age OR geriatric OR seniors) ti/ab/kw
4. ((old OR older OR aging OR aged OR senior OR elder\*) NEAR/3 (person OR persons OR people OR adult\* OR subject\* OR patient\* OR consumer\* OR male OR males OR female\* OR men OR women)) ti/ab/kw
5. OR/1-4
6. 'hospital discharge' ti/ab/kw
7. 'early supported discharge' ti/ab/kw
8. 'progressive patient care' ti/ab/kw
9. 'home care' OR 'home physiotherapy' OR 'home rehabilitation' ti/ab/kw
10. 'home environment' ti/ab/kw
11. 'community based rehabilitation' ti/ab/kw
12. (early supported discharge OR ESD) ti/ab/kw
13. ((early OR earlier OR prompt OR accelerate\$ OR acute OR subacute OR supported) NEAR/5 discharg\$) ti/ab/kw
14. (reduce\$ NEAR/5 (duration OR length) NEAR/5 (stay OR hospital)) ti/ab/kw
15. (reduce\$ NEAR/5 (hospital OR inpatient OR in-patient) NEAR/5 (stay OR care)) ti/ab/kw
16. short-term ward ti/ab/kw
17. ((organi?ed OR multidisciplinary) NEAR/5 discharge NEAR/5 team\$) ti/ab/kw
18. ((early OR earlier OR prompt OR accelerate\$ OR supported) NEAR/5 return\$ NEAR/2 home\$) ti/ab/kw
19. (hospital\$ NEAR/3 home\$) ti/ab/kw
20. hospital rehabilitation unit\$ ti/ab/kw

21. (rehabilitation NEAR/3 home\$) ti/ab/kw
22. (intensive NEAR/2 home NEAR/5 (rehabilitation OR support\$)) ti/ab/kw
23. (mobile NEAR/2 team\$) ti/ab/kw
24. organi?ed home care ti/ab/kw
25. ((post-discharge OR home rehabilitation) NEAR/5 (support\$ OR care)) ti/ab/kw
26. ((early OR earlier OR acute OR subacute OR post-discharge) NEAR/5 (community OR domiciliary OR primary care OR home OR home-based) NEAR/5 (rehabilitation OR support\$ OR care)) ti/ab/kw
27. OR/6-26
28. 'Randomi?ed Controlled Trial' ti/ab/kw
29. Randomi?ation ti/ab/kw
30. 'Controlled Study' ti/ab/kw
31. 'control group' ti/ab/kw
32. 'clinical trial' OR 'phase 1 clinical trial' OR 'phase 2 clinical trial' OR 'phase 3 clinical trial' OR 'phase 4 clinical trial' OR 'controlled clinical trial' ti/ab/kw
33. 'Double Blind Procedure' ti/ab/kw
34. 'Single Blind Procedure' OR 'triple blind procedure' ti/ab/kw
35. 'Parallel Design' ti/ab/kw
36. random\$ ti/ab/kw
37. (controlled NEAR/5 (trial\$ OR stud\$)) ti/ab/kw
38. (clinical\$ NEAR/5 trial\$) ti/ab/kw
39. ((control OR treatment OR experiment\$ OR intervention) NEAR/5 (group\$ OR subject\$ OR patient\$)) ti/ab/kw
40. ((control OR experiment\$ OR conservative) NEAR/5 (treatment OR therapy OR procedure OR manage\$)) ti/ab/kw
41. ((singl\$ OR doubl\$ OR tripl\$ OR trebl\$) NEAR/5 (blind\$ OR mask\$)) ti/ab/kw

42. (assign\$ OR alternate OR allocat\$ OR counterbalance\$ OR multiple baseline) ti/ab/kw

43. controls ti/ab/kw

44. trial ti/ab/kw

45. OR/28-44

46. 5 AND 27 AND 45

*Permission to re-use file by SW.*
